# Wakefulness state modulates conscious access: Suppression of auditory detection in the transition to sleep

Valdas Noreika<sup>1,2</sup>, Andrés Canales-Johnson<sup>1,2</sup>, William J. Harrison<sup>2</sup>, Amy Johnson<sup>1</sup>, Aurina Arnatkevičiūtė<sup>1,3</sup>, Justin Koh<sup>2</sup>, Srivas Chennu<sup>4,5</sup>, Tristan A. Bekinschtein<sup>2,1</sup>

<sup>1</sup>MRC Cognition and Brain Sciences Unit, Cambridge, UK. <sup>2</sup>Department of Psychology, University of Cambridge, Cambridge, UK. <sup>3</sup>Department of Neurobiology and Biophysics, Vilnius University, Vilnius, Lithuania. <sup>4</sup>School of Computing, University of Kent, Medway, UK. <sup>5</sup>Department of Clinical Neurosciences, University of Cambridge, Cambridge, UK.

Correspondence should be addressed to Valdas Noreika: valnoreika@gmail.com (vn261@cam.ac.uk).

**Acknowledgement.** This research was supported by a Wellcome Trust Biomedical Research Fellowship WT093811MA (TAB).

## ABSTRACT

Neural basis of consciousness and its suppression are typically studied by manipulating stimuli around the conscious access threshold, or – alternatively – by contrasting conscious and unconscious states (i.e. awake/sleep). Here we show that behavioural and neural markers of conscious access are dependent on wakefulness state, and thus a comprehensive description of the neural basis of conscious access requires an integrated assessment of the state of consciousness. In particular, we demonstrate that a distinctive steepness of a behavioural slope of conscious access is severely compromised during the transition to sleep. Likewise, electrophysiological markers show a delayed processing of target-mask interaction during drowsiness. Consequently, the resolution of conscious access shifts from perceptual to executive stages of processing in the drowsy state of consciousness. Once the goal is set – to report the awareness of a target – the brain is capable to adapt to rapidly changing wakefulness states, revealing that the neural signatures of conscious access and its suppression may not be hard-wired but flexible to maintain performance.

## INTRODUCTION

In the past decade, two independent research programs have crystalized for studying neural correlates of consciousness (NCC): one program focuses on the neural mechanisms of conscious access (Dehaene & Changeux, 2011; Koch, Massimini, Boly, & Tononi, 2016), while the other one seeks to explain the neural basis of a state of consciousness (Fernández-Espejo & Owen, 2013; Siclari et al., 2016; Tagliazucchi, Behrens, & Laufs, 2013). Conscious access, reportable awareness of exogenous input, is typically studied by presenting target stimuli around a threshold value, which enables a contrast between

51 trials of presence versus absence of reported awareness. A paradigmatic example of this approach is the  
52 presentation of targets with variable intensities of noise, rendering them inaccessible in a subset of  
53 trials (Marcel, 1983). Proposed neural correlates of conscious access could be grouped into relatively  
54 ‘early’ processes such as recurrent processing within sensory cortices and sensory-central interactions  
55 (~100-250 ms post-stimulus) (Boehler, Schoenfeld, Heinze, & Hopf, 2008; Railo, Koivisto, & Revonsuo,  
56 2011), and relatively ‘late’ contribution of central executive processes (~250-400 ms post-  
57 stimulus) (Dehaene, Charles, King, & Marti, 2014; Antoine Del Cul, Baillet, & Dehaene, 2007). While a  
58 theoretical disagreement persists as to whether the early candidates for NCC reflect a ‘pre-  
59 conscious’ (Dehaene, Changeux, Naccache, Sackur, & Sergent, 2006) or a ‘phenomenally  
60 conscious’ (Koch et al., 2016; Koivisto & Revonsuo, 2010) stage of processing, a general consensus is that  
61 reportable conscious access is associated with the late executive NCC. The Global Neuronal Workspace  
62 model of consciousness interprets the late NCC as a non-linear stage of processing when specific  
63 information of sensory input is amplified and re-encoded in additional areas, including a prefrontal-  
64 parietal network (Baars, Franklin, & Ramsøy, 2013; Dehaene et al., 2014; Salti et al., 2015). As such,  
65 conscious access is characterized -both behaviourally and neurophysiologically- by a sigmoidal  
66 relationship between performance/brain markers and degree of masking (Antoine Del Cul et al., 2007;  
67 Fisch et al., 2009; Moutard, Dehaene, & Malach, 2015).

68 Instead of contrasting trials that differ in the awareness of particular stimuli, the second group of  
69 NCC studies aims to contrast different states of consciousness, such as awake vs. sedated (Bartfeld et al.,  
70 2015), awake vs. anaesthetized (Langsjo, Revonsuo, & Scheinin, 2014), awake vs. asleep (Tagliazucchi et  
71 al., 2013), dreaming vs. dreamless sleep (Siclari et al., 2016), or minimally conscious state vs.  
72 unresponsive wakefulness syndrome (Demertzi et al., 2015). Typically, the states of consciousness are  
73 characterized by relatively stable neural processes that range between several hundreds of milliseconds to  
74 minutes and can be measured by indices of oscillatory dynamics and information sharing (Chennu et al.,  
75 2014; King et al., 2013; Sitt et al., 2014; Tagliazucchi & Laufs, 2014). From the perspective of the parallel  
76 program of research into conscious access, state NCC are typically regarded as an enabling factor  
77 determining the capacity for conscious access (Chalmers, 2000; Singer, 2015). That is, state NCC are seen  
78 as necessary to enable conscious access, but their proposed role is limited to arousal modulation, and their  
79 likely influence on conscious access mechanism has not been considered, nor included formally in  
80 integrative models of consciousness. In contrast to this mainstream view, we propose that arousal is  
81 unlikely to simply act as an enabling factor for conscious access but in fact it may differentially modulate  
82 the neural processes leading to conscious access.

83 Here we integrated the conscious access- and the conscious state-focused NCC programs by  
84 studying behavioural and neural dynamics of auditory backward-masked targets in the transition from  
85 awake to sleep (Goupil & Bekinschtein, 2012). In particular, we suppressed consciousness along two  
86 dimensions: (1) conscious access was exogenously manipulated by masking the auditory targets, and (2)  
87 the overall level of wakefulness was endogenously decreased by facilitating natural transition from awake  
88 to sleep. This experimental paradigm reduced arousal and yielded a considerable proportion of drowsy yet  
89 responsive trials. This way, we were able to study the interaction between conscious access (“aware” vs.  
90 “unaware” trials) and conscious states (“awake” vs. “drowsy” trials). Based on the premises that (1)  
91 conscious access depends on the sensory activation as well as fronto-parietal hub (Dehaene & Changeux,  
92 2011; Koivisto & Revonsuo, 2010), (2) both sensory-perceptual and fronto-parietal networks are impaired  
93 in drowsiness (Ogilvie, 2001; Olbrich et al., 2009; Picchioni et al., 2008), (3) behavioural performance  
94 diminished in drowsiness (Bareham, Manly, Pustovaya, Scott, & Bekinschtein, 2014; Vyazovskiy et al.,  
95 2011), we predicted an interaction between conscious state and access: that the slope of conscious access  
96 will decrease as a function of arousal, whilst the corresponding sensory and executive electrophysiological  
97 markers of conscious access will show more sluggish dynamics in a drowsy state of consciousness.  
98 Indeed, our findings confirm that both the behavioural and electrophysiological correlates of conscious  
99 access are altered by changing the state of wakefulness.

100  
101

102 **RESULTS**

103  
104  
105  
106  
107  
108  
109  
110  
111  
112  
113  
114  
115  
116  
117  
118  
119

To investigate neural correlates of conscious access in the transition from wakefulness to sleep, an auditory detection task was carried out with human participants (N=31) while they were entering a daytime nap, i.e. participants were encouraged to relax and fall asleep if they wished so. On test trials, a target sound was presented and then followed by a masking noise after one of 11 intervals of silence centred on an individualised target detection threshold (see Fig 1A). Participants were instructed to report if they have heard a target sound or not after a response cue. High-density electroencephalography (EEG) measurements were carried out throughout the experiment. To assess the fluctuating level of arousal at a single trial level, two EEG measures were derived from the spontaneous pre-stimulus oscillations. First, the ratio of theta/alpha ( $\theta/\alpha$ : 4-7 Hz/8-12 Hz) spectral power over a 2 sec pre-stimulus period was used for behavioural analyses (see Fig 1 and Online Methods); and second, Hori stages of sleepiness over a 4 sec pre-trial period were assessed for EEG analyses (Bareham, Manly, Pustovaya, Scott, & Bekinschtein, 2014; Hori, Hayashi, & Morikawa, 1994). As a complementary behavioural measure of drowsiness, reaction times (RT) locked to the onset of response cue were calculated.

[insert Figure 1]

## A Temporal structure of an individual trial and the three measures of drowsiness

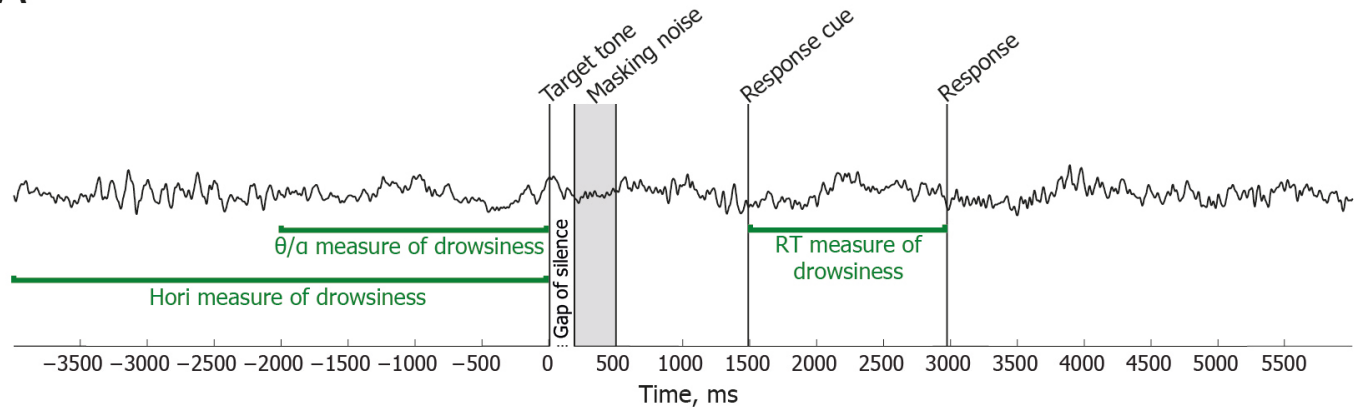

## B Hori stages of sleep onset

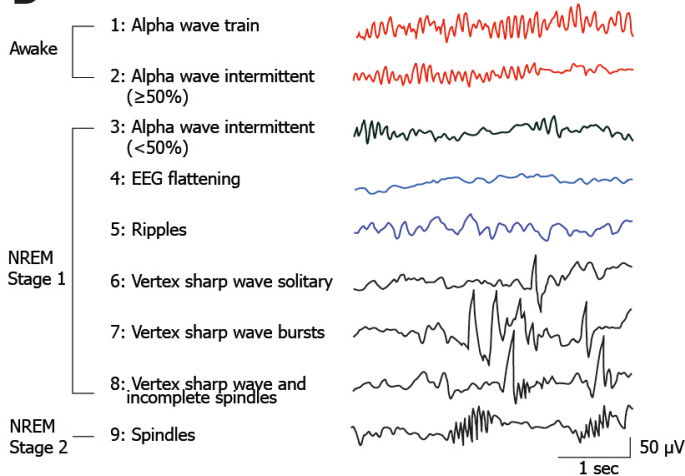

## C Dominant level of drowsiness

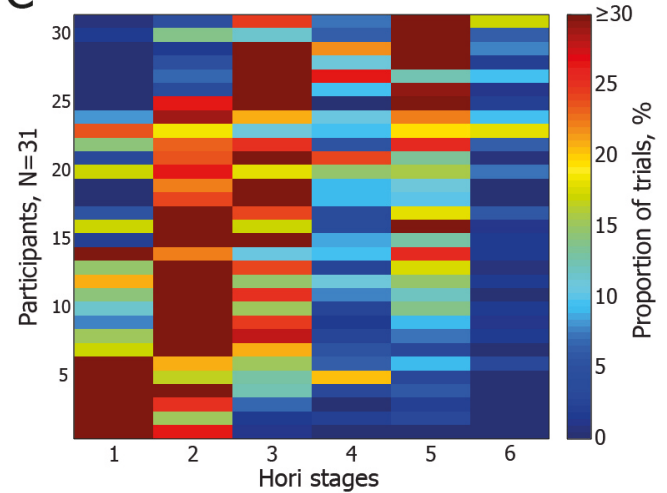

## D Fluctuating level of drowsiness within a single session

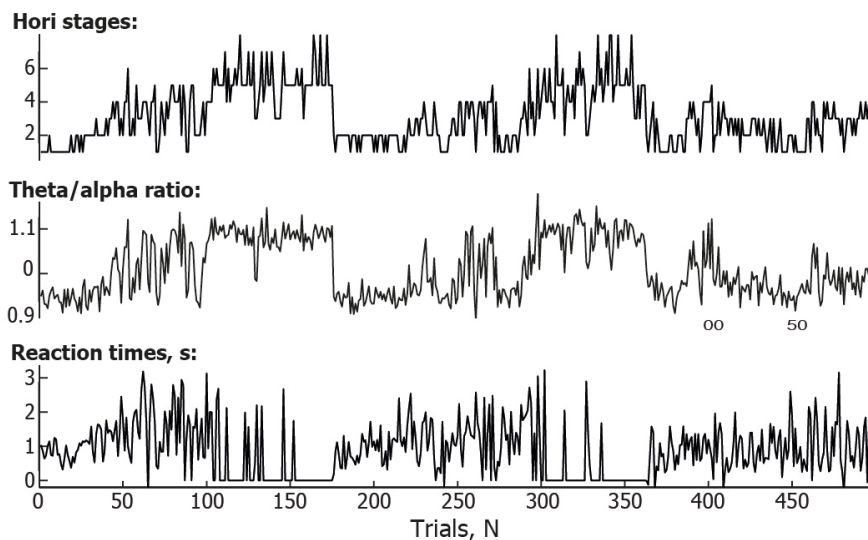

## E Association between measures of drowsiness

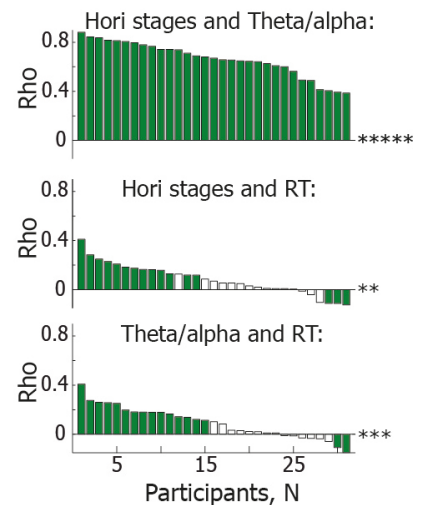

120  
121  
122  
123  
124  
125

**Figure 1. Experimental design and measurement of drowsiness.** (A) Trial structure depicted in a time window of a single EEG epoch from -4000 ms to 6000 ms in relation to the onset of a target tone. Following a target tone that lasted for 10 ms, a variable gap of silence took place until the onset of a masking noise. A mask lasted for 300 ms (marked as a grey shaded bar) and 1000 ms after its offset the target tone was presented again, this time acting as a response cue. Participants were instructed to respond if they could hear the target tone preceding the masking noise.

126 Responses beyond 6000 ms from the onset of target were not considered and the trial was regarded as unresponsive.  
127 Green lines indicate time windows of the three measures of drowsiness: -4000 ms to 0 ms period was used for  
128 scoring Hori stages of sleep onset (in this example, Hori Stage 5 is shown in the right occipital channel); -2000 ms  
129 to 0 ms time window was used to calculate EEG spectral power ratio between theta (4-7 Hz) and alpha (8-12 Hz)  
130 frequency bands; and a time window from the response cue to the response was used as an indirect behavioural RT  
131 measure of drowsiness. **(B)** EEG examples and brief definitions of 9 Hori stages of sleep onset progression from the  
132 relaxed wakefulness to the non-rapid eye movement (NREM) Stage 2 sleep (modified with permission  
133 from(Ogilvie, 2001)). Hori stages 1-2 defined awake trials (marked in red), whereas Hori stages (4-5) defined  
134 drowsy trials (marked in blue). **(C)** Percentage of trials scored as different Hori stages within each participant  
135 whose data were used for the analyses of conscious access. Datasets are sorted here from the most alert participants  
136 1-6 with the dominance of Hori stage 1 to the drowsiest participants 30 and 31 with the dominance of Hori stage 5.  
137 There were relatively few epochs of Hori stage 4 (EEG flattening is known to last for a relatively short period of  
138 time(Doerfling, P., Ogilvie, R.D., Murphy, T., Lamarche, 1996)) and Hori stages 6 and above. **(D)** A representative  
139 dataset of one participant with good agreement between the three measures of drowsiness across 500 consecutive  
140 trials. The top subplot indicates Hori stages, the middle subplot depicts  $\theta/\alpha$  ratio, and the bottom subplot shows  
141 fluctuation of RT. An RT of 0 indicates an unresponsive trial, whereas a negative RT indicates a premature  
142 response that took place before the response cue. **(E)** Correlations between different measures of drowsiness: Hori  
143 stages vs.  $\theta/\alpha$  power (top), Hori stages vs. RT (middle), and  $\theta/\alpha$  power vs. RT (bottom). Bars represent intra-  
144 individual Spearman's rank order correlation coefficients between the respective measures of drowsiness for 31  
145 participants, sorted from the most positive to the least positive correlation coefficients. Green bars represent  
146 participants with a significant intra-individual correlation, whereas white bars represent participant who did not  
147 show a significant correlation between two respective measures of drowsiness. Group level analyses of the  
148 correlation coefficients were carried out using one-sample t tests with the following levels of significance: \*\*  
149  $p<0.005$ ; \*\*\* $p<0.0005$ ; \*\*\*\*\* $p<0.000005$ . While some individuals showed a consistent pattern of state-fluctuation  
150 across all three measures of drowsiness, a very high convergence was observed only between Hori and  $\theta/\alpha$   
151 measures of drowsiness.

152  
153

## 154 **Transition to sleep modulates behavioural marker of conscious access**

155 To compare distribution of a hit rate as a function of conscious state, sigmoid function was fitted across  
156 11 gap conditions for each participant separately for the  $\theta/\alpha$ - and RT-defined awake and drowsy trials,  
157 yielding individual threshold and slope estimates for both states of consciousness. While the threshold of  
158 conscious access did not differ significantly between awake and drowsy trials, we observed a significant  
159 decrease of sigmoid slope in drowsy states of consciousness (see Fig 2A-B, Supplementary Table 1, and  
160 Supplementary Fig 1A-B). Notably, a decreased slope in drowsiness was observed following four  
161 alternative splits of data defined by  $\theta/\alpha$  and RT measures of drowsiness ( $\theta/\alpha$ -33%,  $\theta/\alpha$ -50%, RT-33%, and  
162 RT-50%; see Online Methods). In all cases, the decreasing slope of sigmoid function indicated that  
163 conscious access becomes more gradual in the transition from wakefulness to sleep.

164 To test formally if the dynamics of conscious access differs between states of consciousness, we  
165 analysed how well the behavioural data fits a sigmoidal versus a linear model, comparing the coefficient  
166 of determination  $R^2$  of both models in the  $\theta/\alpha$ - and RT-defined awake and drowsy states. A significant  
167 Models x States interaction was observed ( $\theta/\alpha$ -33%:  $F_{(1,26)}=13.82$ ,  $p=0.0009$ , see Fig 2C; RT-33%:  
168  $F_{(1,25)}=33.34$ ,  $p=0.000005$ ). Even though sigmoidal models had a higher  $R^2$  than linear models in both  
169 states of consciousness, a difference between the models was significantly lower in drowsiness ( $\theta/\alpha$ -33%:  
170  $M=0.057$ ,  $SEM=0.015$ ; RT-33%:  $M=0.037$ ,  $SEM=0.01$ ) than in wakefulness ( $\theta/\alpha$ -33%:  $M=0.098$ ,  
171  $SEM=0.014$ ,  $t_{(26)}=3.72$ ,  $p=0.001$ ,  $d=0.54$ ; RT-33%:  $M=0.114$ ,  $SEM=0.015$ ,  $t_{(25)}=5.77$ ,  $p=0.000005$ ,  
172  $d=5.97$ ). These findings point to a change of conscious access dynamics in the transition from  
173 wakefulness to sleep. As the slope of conscious access decreases in drowsy states of consciousness, a  
174 distinction between “aware” and “unaware” trials becomes less dichotomous.

175 Hypothetically, the decrease of slope in trials split by EEG  $\theta/\alpha$  power ratio may have depended on  
176 neurocognitive processes other than changes in arousal, e.g. changes in pre-stimulus alpha power may  
177 reflect endogenous fluctuation of attentional sampling and/or sensory gating(Capotosto, Babiloni,

178 Romani, & Corbetta, 2009; van Dijk, Schoffelen, Oostenveld, & Jensen, 2008). To examine this  
179 alternative, we carried out a complementary analysis based on Hori-defined stages of the transition from  
180 wakefulness to sleep. For each individual, the percentage of hits in the most difficult gap conditions ‘-  
181 100%’, ‘-75%’, ‘-50%’ was subtracted from the percentage of hits in the easiest gap conditions ‘+50%’,  
182 +75%’, ‘+100%’, separately for each of the available Hori Stages 1-6. The difference score between the  
183 easy and difficult conditions decreased from Hori Stage 1 to Stage 6 ( $F_{(1,5)}=30.18$ ,  $p<0.00005$ ; see Fig  
184 2D), confirming that participants gave less “aware” responses in the easy trials and more “aware”  
185 responses in the difficult trials when the level of drowsiness increased, which indicates a reduced  
186 capability to discern between difficult and easy trials in a drowsy state. This finding corresponds to a  
187 decrease of slope observed in the RT- and  $\theta/\alpha$ -based analyses, confirming a reduced steepness of  
188 conscious access in a drowsy state of consciousness.

189 Interestingly, threshold estimates in the  $\theta/\alpha$ - and RT-awake state correlated strongly with threshold  
190 estimates in drowsiness (coefficient  $r$ : 0.52-0.77, see Supplementary Table 1). Likewise, slope estimates  
191 correlated positively between awake and drowsy states of consciousness as defined by  $\theta/\alpha$  (coefficient  $r$ :  
192 0.2-0.78, see Supplementary Table 1). That is, participants who performed well in wakefulness were also  
193 more accurate in drowsiness, showing that individual traits of threshold and slope of auditory access are  
194 relatively stable across the two states of consciousness. Contrary to this, threshold and slope were not  
195 correlated in any of the  $\theta/\alpha$ - or RT-based data splits of data ( $p$ : 0.12-0.94; see Supplementary Table 1),  
196 suggesting that these two behavioural measures of conscious access are independent. This observation is  
197 consistent with the main behavioral finding that slope decreases with drowsiness but threshold remains  
198 unaffected. Overall, behavioural findings revealed that the distinctive non-linearity of conscious access  
199 may not be a necessary feature of consciousness; instead, it might be state-dependent. To study whether  
200 neural markers of conscious access are also state-dependent, we first determined a sequence of neural  
201 processing stages that distinguish aware and unaware trials.

202  
203  
204

[insert Figure 2]

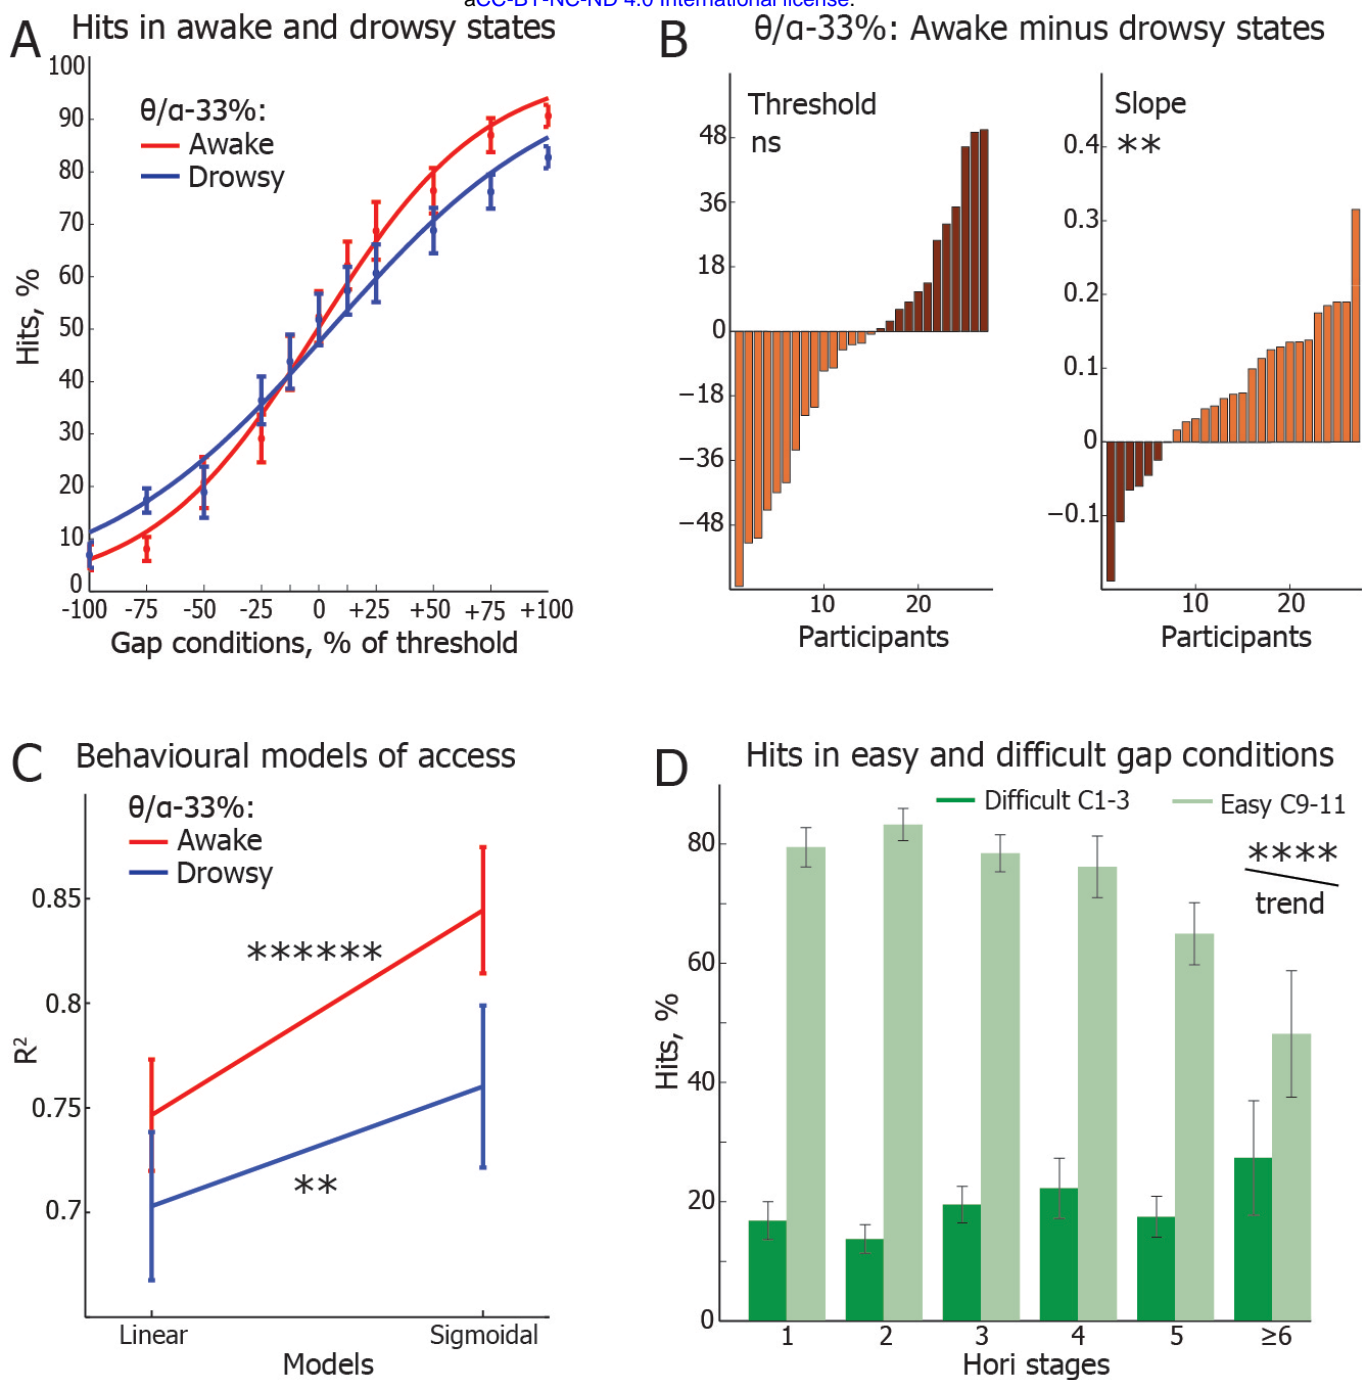

205  
206  
207  
208  
209  
210  
211  
212  
213  
214  
215  
216  
217  
218

**Figure 2: Slope and threshold of conscious access in the EEG-defined awake and drowsy states.** (A) Sigmoidal functions fitted to the awake (red) and drowsy (blue) hits, following  $\theta/\alpha$ -33% definitions of the states of consciousness. The trials were first averaged within each participant and then across all participants. The error bars indicate the standard error of mean (SEM), calculated across all participants. (B) Threshold and slope estimates in the drowsy state subtracted from those in the awake state. Individual participants (N=27), represented as bars, are sorted from the one with the largest increase of threshold (light brown) to the one with the largest decrease (dark brown) of threshold in drowsiness (left), and from the one with the largest increase of slope (light brown) to the one with the largest decrease of slope (dark brown) in drowsiness (right). Data split in this plot is based on the  $\theta/\alpha$ -33% definition of the awake and drowsy states. Levels of significance: ns =  $p > 0.05$ ; \*\*  $p < 0.005$ . (C) Goodness of fit (coefficient of determination,  $R^2$ ) of linear and sigmoidal models of the proportion of hits as a function of gap conditions in the awake and drowsy trials as defined by  $\theta/\alpha$ -33%. The error bars indicate the SEM. Levels of significance: \*\*  $p < 0.005$ ; \*\*\*\*\*  $p < 0.0000005$ . (D) Proportion of hits in the right tail of sigmoid (easy gap conditions +50%, +75%, +100%; light green) and in the left tail of sigmoid (difficult gap conditions -100%, -75%, -

219 50%; dark green) across Hori stages. A difference between the easy and difficult conditions decreases with  
220 increasing drowsiness. The error bars indicate the SEM. Level of significance (linear contrast): \*\*\*\*  $p < 0.00005$ .

## 221 222 223 **Neural markers of conscious access and its suppression**

224  
225 Given that both sensory and executive stages of processing may index conscious access (Dehaene et al.,  
226 2014; Railo et al., 2011), and that the target and the masking stimuli were presented serially, we  
227 considered that reported awareness of a target might be associated with an increase of target-evoked  
228 event-related potentials (ERP), namely N100, P200 and P300, whereas suppression of conscious access  
229 might be marked by the higher amplitude of mask-evoked N100, P200 and P300 responses. Thus, aiming  
230 to identify neural markers of the suppression of conscious access, we first contrasted respective potentials  
231 locked to the onset of mask (see Fig 3A) by carrying data-driven spatiotemporal clustering of hits and  
232 misses at a single-trial level (see Online Methods).

233 We found a significantly more negative fronto-central N100 cluster from 42 ms to 142 ms (see Fig  
234 3B) and a significantly more positive occipital cluster from 42 ms to 134 ms in misses compared hits.  
235 Likewise, clustering of P200 potentials revealed that misses were associated with a more positive central  
236 cluster (150-246 ms, see Fig 3C) and a more negative frontal cluster (146-246 ms) than hits. Finally,  
237 misses were associated with more positive parieto-occipital P300 cluster (290-482 ms, see Fig 3D) and  
238 more negative frontal cluster (278-530 ms) than hits. In other words, when amplitude of N100, P200 and  
239 P300 responses to the masking sound was relatively low, i.e. the mask evoked a relatively weaker ERP  
240 response, participants reported awareness of the target sound. Contrary to this, when the mask evoked  
241 relatively higher N100, P200 and P300 responses to noise, conscious access was suppressed.

242 We next investigated if ERP to the target sound would also distinguish hits and misses, this time  
243 revealing neural mechanisms of conscious access rather than its suppression. We found a significantly  
244 more negative central N100 cluster of electrodes from 118 ms to 166 ms (see Fig 3B) and a more positive  
245 occipital cluster of electrodes from 112 ms to 166 ms in hits compared to misses. That is, hits or “aware”  
246 trials had higher amplitude of N100 response to the target tone, pointing to a relatively early sensory  
247 ignition of auditory consciousness. Given that the target and the masking sounds were relatively adjacent  
248 in time, i.e. the mean gap of silence between them was 71 ms (range: 7-202 ms), evoked potentials to the  
249 target and mask largely overlapped, occluding the analysis of P200 and P300 responses specific to the  
250 target. No significant ERP differences between hits and misses were found within P50 time window.

251 In summary, spatiotemporal clustering of ERP differences between hits and misses revealed a  
252 cascade of electrophysiological markers at different depths of processing that distinguished conscious and  
253 unconscious trials. In particular, conscious access was associated with enhanced N100 response to the  
254 target, whereas the suppression of conscious access was associated with enhanced amplitude of potentials  
255 evoked by the mask (N100, P200, P300). To investigate which of these markers of target-mask interaction  
256 are modulated by the state of wakefulness, we split the data between awake (Hori 1-2 stages) and drowsy  
257 (Hori 4-5 stages) trials, and investigated (1) whether the temporal proximity of target and mask  
258 differentially modulates ERP clusters in the awake and drowsy states; (2) whether the ERP markers of  
259 conscious access and its suppression are state-dependent; and (3) whether the activation of fronto-parietal  
260 sources of these ERP markers, a proposed NCC of globally broadcasted and reported awareness (Baars et  
261 al., 2013; Dehaene et al., 2014), is state-dependent.

262



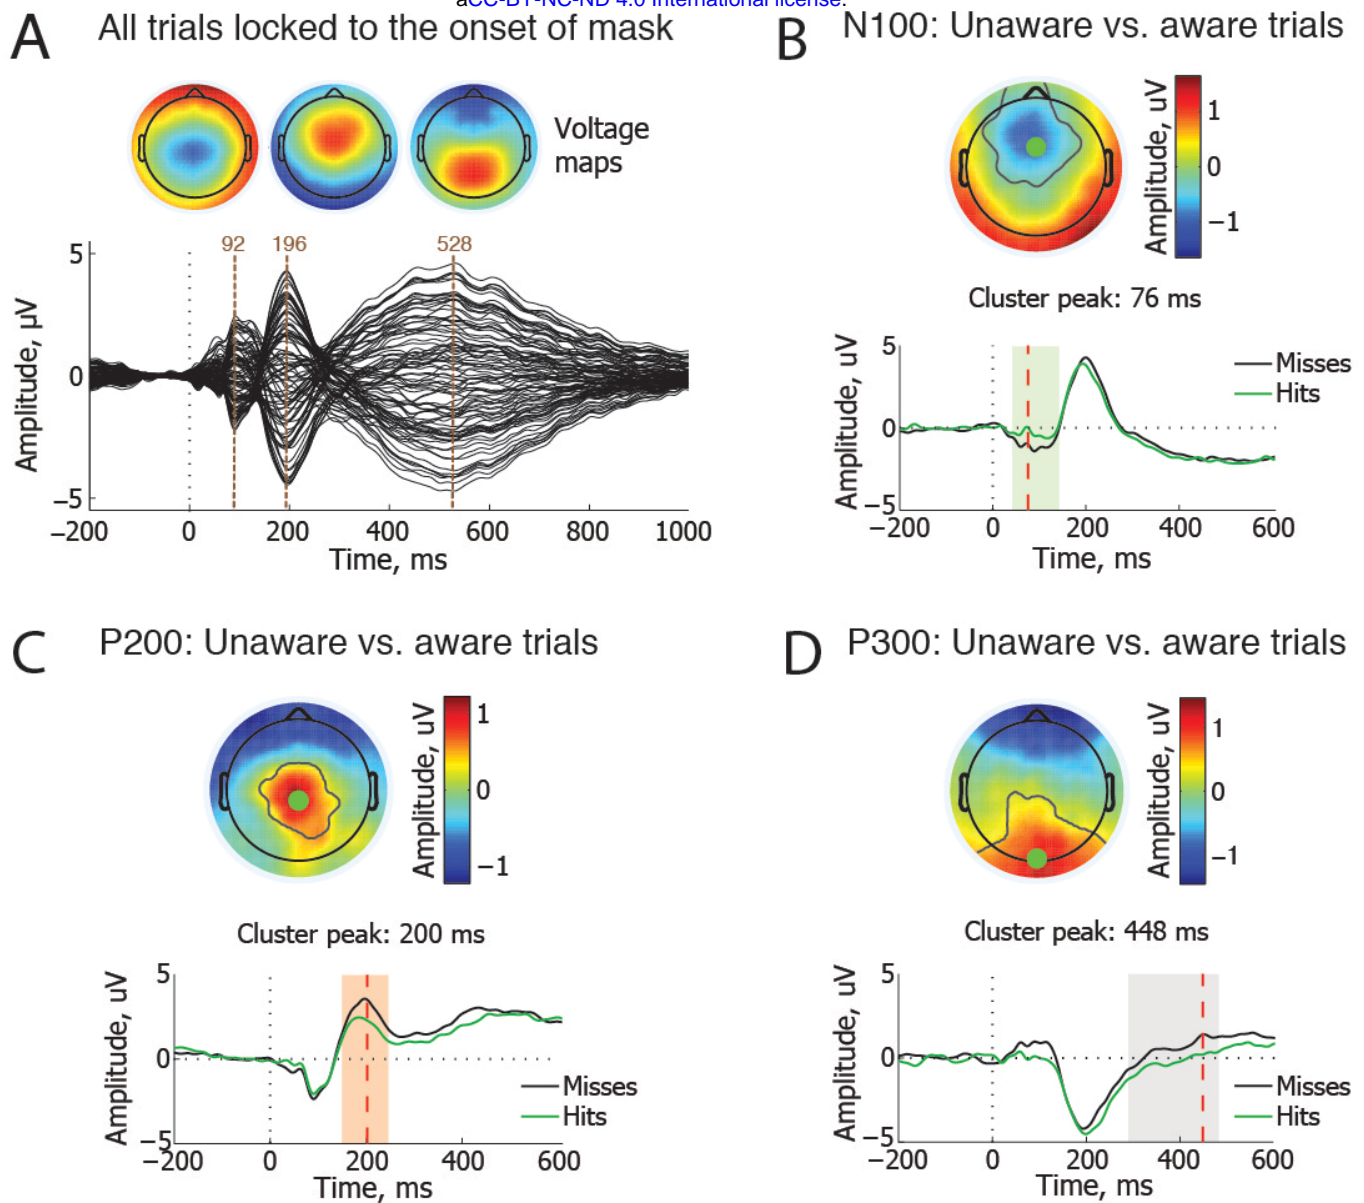

263  
264  
265  
266  
267  
268  
269  
270  
271  
272  
273  
274  
275  
276  
277  
278  
279  
280  
281

**Figure 3: ERP markers of the suppression of conscious access.** (A) A butterfly plot of ERP waveforms locked to the onset of mask, baseline corrected from -100 ms to 0 ms. Topographical voltage maps depict spatial distribution of the butterfly peaks at at 92 ms, 196 ms, and 528 ms (brown verticals), revealing typical distribution of N100, P200 and P300 auditory potentials. Data are taken from all 31 participants. (B-D) Spatiotemporal clustering of ERPs (hits vs. misses) locked to the masking sound within N100, P200 and P300 time windows. Misses were associated with significantly more negative amplitude of (B) N100 peak (cluster  $t=3674.8$ ,  $p=0.001$ ), and more positive amplitude of (D) P200 peak (cluster  $t=3327.3$ ,  $p=0.001$ ) and (E) P300 peak (cluster  $t=5534.7$ ,  $p=0.004$ ) compared to the hits. (B-D) Grey shaded vertical bars behind the waveforms represents time window of a significant difference between hits (green waveform) and misses (black waveform): green for the N100 cluster, orange for the P200 cluster, and grey for the P300 cluster. The waveforms are taken from the electrode with the largest difference between hits and misses, marked as a green dot in the topographical voltage map. The black contours within the map reveal which electrodes showed a significant difference, i.e. the higher amplitude in misses than hits, and formed a spatiotemporal cluster. Red vertical lines in the waveforms reveal the peak time of the largest difference between hits and misses. The topographical voltage maps depicts the very same time point of the most significant difference between conditions.

## 282 **Transition to sleep modulates sensory-central gating**

283

284 Given that temporal proximity of the target and masking sounds largely determines if target awareness  
285 will be reported (see Fig 2A), we first hypothesized that electrophysiological signature of this proximity  
286 will echo the first stages of neural processing that leads to conscious access. In particular, neuronal  
287 responses to suppressive masking noise should change as a function of a delay from the preceding target  
288 tone. That is, mask-evoked ERP responses should have higher amplitude in the most difficult gap  
289 conditions when conscious access is suppressed, and smaller amplitude in the easiest gap conditions when  
290 target tones escape suppression. More specifically, we hypothesized that the delay between target and  
291 mask will modulate mask-evoked responses in N100 or P200 time windows when sensory information  
292 becomes available for central processing, i.e. during sensory- or sensory-central gating(Lijffijt et al.,  
293 2012). Contrary to this, P300 as a marker of the final stages of processing of conscious access was not  
294 expected to expose relatively early sensory-central gating as it reflects central processes rather than  
295 perceptual processing of stimuli(Chennu et al., 2013). To test these hypotheses, we fitted a linear function  
296 to the mean amplitude of ERP responses in the N100, P200, and P300 cluster time windows across 11 gap  
297 conditions, separately for each electrode, and then analysed topographical heat maps of slope and  $R^2$   
298 values (see Fig 4A-B).

299 N100 and P200 maps showed relatively high slope and  $R^2$  values, indicating that mask-evoked  
300 potentials reflect temporal proximity of target-masking sounds in these time windows. Contrary to this,  
301 slope and  $R^2$  values were very low in P300 time window (see Supplementary Fig 2). Furthermore, we  
302 observed that sensory-central gating in N100 and P200 time windows is state-dependent. In particular,  
303 slope maps showed a linear decrease of N100 amplitude across the gap conditions in the Hori-awake state,  
304 whereas P200 rather than N100 showed a similar effect in Hori-drowsiness (see Fig 4). These findings  
305 indicate that temporal proximity of target and masking sounds, which is key determinant for conscious  
306 access and its suppression, is processed at a relatively early N100 time window in the awake state of  
307 consciousness, and that this stage of processing is delayed to the P200 time window in drowsiness. That  
308 is, sensory-central gating becomes more sluggish in the transition from wakefulness to sleep, and probably  
309 more resources are required to determine the presence of the target followed by the mask during drowsy  
310 states.

## A Linear fit of N100 response to mask across gap conditions

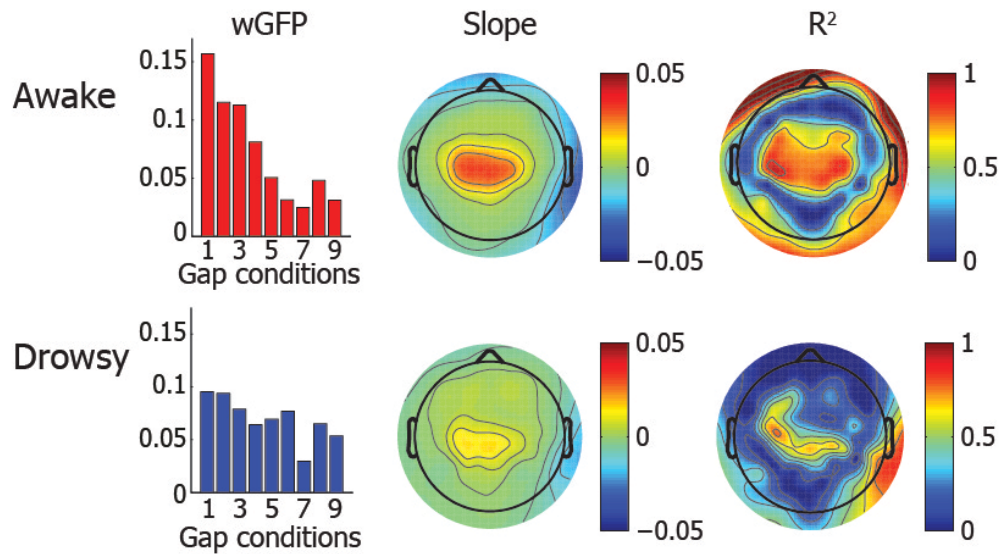

## B Linear fit of P200 response to mask across gap conditions

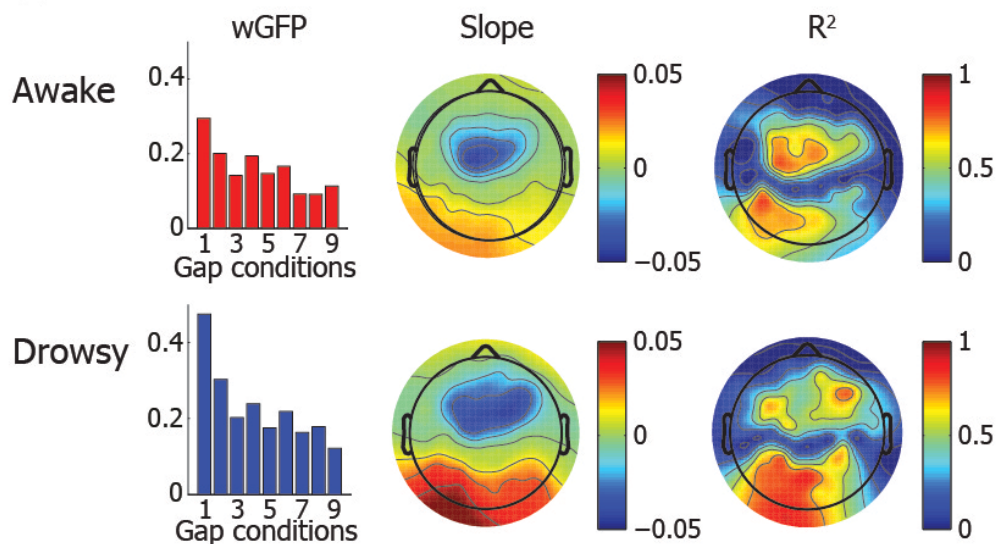

## C Contrasting linear fit of N100 and P200 responses to mask in Awake and Drowsy states

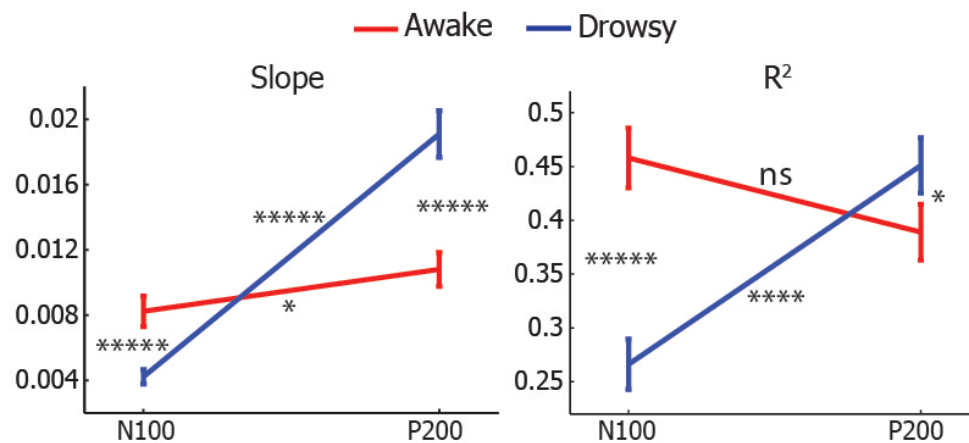

312 **Figure 4: Linear fit of N100 and P200 responses to the onset of mask across gap conditions.** Linear fit of the  
313 mask-locked N100 (A) and P200 (B) mean amplitudes across 11 gap conditions. In both (A) and (B), the top line  
314 represents fit of the awake trials (Hori 1-2), whereas the bottom line depicts fit of the drowsy trials (Hori 4-5).  
315 Subplots on the left show the weighted global field power (wGFP) in a time window of interest (N100 and P200)  
316 across 9 equally spaced gap conditions. Conditions '-12.5%' and '+12.5%' are not presented here, as they were  
317 additional intermediate intervals. The middle subplots show scalp maps of slope values of a linear function, which  
318 was fitted to the mean amplitude of N100 and P200 peaks across 11 gap conditions. The slope was first calculated  
319 for each electrode and the obtained values were interpolated in the heat maps. Likewise, subplots on the right show  
320 scalp maps of the goodness of linear fit, expressed as  $R^2$ , which was first calculated for each fit across gap  
321 conditions within a single electrode, and the obtained values were interpolated in the heat maps. (C) Statistical  
322 comparisons of the heat maps shown in (A) and (B). Repeated measures ANOVA was carried out on 92 slope (on  
323 the left) or  $R^2$  values (on the right), representing each electrode, with the State (Awake, Drowsy) and Component  
324 (N100, P200) as independent factors. The plots show the mean slope or  $R^2$  of all electrodes, and the error bars  
325 represent SEM. Analysis of the slope showed a significant main effect of the ERP components (N100 vs. P200;  
326  $F_{(1,91)}=41.62$ ,  $p=0.00000$ ), the States (Awake vs. Drowsy;  $F_{(1,91)}=10.47$ ,  $p=0.0017$ ), and a significant ERP  
327 components x States interaction ( $F_{(1,91)}=313.35$ ,  $p=0.00000$ ) (see Fig 4C). N100 slope was higher in awake  
328 compared to drowsy state ( $t_{(91)}=6.99$ ,  $p=0.00000$ ,  $d=1.47$ ), whereas P200 slope was higher in drowsy than awake  
329 state ( $t_{(91)}=9.25$ ,  $p=0.00000$ ,  $d=1.94$ ) of consciousness. Furthermore, a difference between ERP slope in P200 and  
330 N100 cluster windows was higher in the drowsy state ( $t_{(91)}=9.35$ ,  $p=0.00000$ ,  $d=1.96$ ) than in wakefulness  
331 ( $t_{(91)}=2.21$ ,  $p=0.029$ ,  $d=0.46$ ). Analysis of  $R^2$  maps yielded significant main effect of the States ( $F_{(1,91)}=17.56$ ,  
332  $p=0.00006$ ) but not of the ERP components ( $F_{(1,91)}=2.67$ ,  $p=0.11$ ), and a significant ERP components x States  
333 interaction ( $F_{(1,91)}=79.64$ ,  $p=0.00000$ ) (see Fig 4C). Coefficient of determination differed between N100 and P200  
334 components in drowsy ( $t_{(91)}=4.7$ ,  $p=0.00001$ ,  $d=0.99$ ) but not in awake ( $t_{(91)}=1.8$ ,  $p=0.076$ ,  $d=0.38$ ) states of  
335 consciousness. N100 had higher  $R^2$  in awake than in drowsy state ( $t_{(91)}=9.52$ ,  $p=0.00000$ ,  $d=2$ ). Contrary to this,  
336 P200 had higher  $R^2$  in drowsy than in awake state ( $t_{(91)}=2.83$ ,  $p=0.0058$ ,  $d=0.59$ ). \*  $p<0.05$ ; \*\*\*\*  $p<0.00005$   
337 \*\*\*\*\* $p<0.000005$ .  
338

### 339 **Transition to sleep modulates neural markers of conscious access**

340 In the above analysis, sensory-central gating was contrasted between awake and drowsy states irrespective  
341 of whether individual trials were hits or misses. To determine how the identified sequence of ERP clusters  
342 behaves when States (Hori-awake vs. Hori-drowsy) and Access (hits vs. misses) vary simultaneously,  
343 trials were split between 4 conditions: awake misses, awake hits, drowsy misses and drowsy hits. We  
344 were particularly interested which of the four consecutive neural markers of conscious access are  
345 modulated by the level of wakefulness: (1) facilitatory sensory ignition by a target tone (target N100); (2)  
346 inhibitory sensory ignition by a noise (mask N100); (3) inhibitory sensory-attentional gating of noise  
347 (mask P200); or (4) inhibitory global broadcasting of noise (mask P300).

348 While the target-evoked N100 cluster showed higher amplitude in the awake than in the drowsy  
349 trials, the relationship between hits and misses remained the same in both states of consciousness (see  
350 Supplementary Fig 4), i.e. a changing brain state did not modulate access NCC at the earliest sensory  
351 ignition stage of target-evoked auditory processing. However, a significant Access x State interaction was  
352 observed for the mask-evoked N100 cluster, with misses being associated with higher amplitude than hits  
353 in the awake, but not in the drowsy state of consciousness (see Fig 5A). That is, sensory processes evoked  
354 by a masking noise interfered with conscious access only when arousal was relatively high. A similar  
355 state-dependent modulation of conscious access was observed in the analysis of mask-evoked P200  
356 cluster: misses had higher cluster amplitude than hits in the awake but not the drowsy state of  
357 consciousness (see Fig 5A). Regarding mask-evoked P300 cluster, misses were associated with higher  
358 amplitude than hits in both states of consciousness, with no significant Access x State interaction (see Fig  
359 5A).

360 These findings indicate that while conscious access was initially associated with higher amplitude of  
361 target-evoked N100 cluster in both awake and drowsy states, the final resolution of target-mask  
362 interaction was delayed in drowsiness. In particular, awake misses had higher mask-locked N100 and

363 P200 amplitude than awake hits, whereas no difference was observed between drowsy misses and hits in  
 364 the same N100 and P200 time windows. Nevertheless, an efficient masking of conscious access in  
 365 drowsiness was revealed at the later P300 stage of processing, when – arguably – conscious processing of  
 366 mask did not spare central resources for conscious awareness of targets. These ERP findings indicate that  
 367 the mechanisms of conscious access and its inhibition are not hardwired; instead, they are state-dependent  
 368 and flexible. Mask-evoked N100 and P200 clusters with a relatively low amplitude did not contribute to  
 369 the inhibition of conscious access in drowsy trials, while a high-amplitude P300 cluster differentiated  
 370 aware and unaware trials in drowsiness. Conscious access is thus resolved at the dominating stage of  
 371 processing – N100/P200 stage during alpha-marked levels of wakefulness (Hori stages 1-3), and P300  
 372 during EEG flattening and the occurrence of theta waves in drowsiness (Hori stage 4-5) (see Fig 5B).  
 373

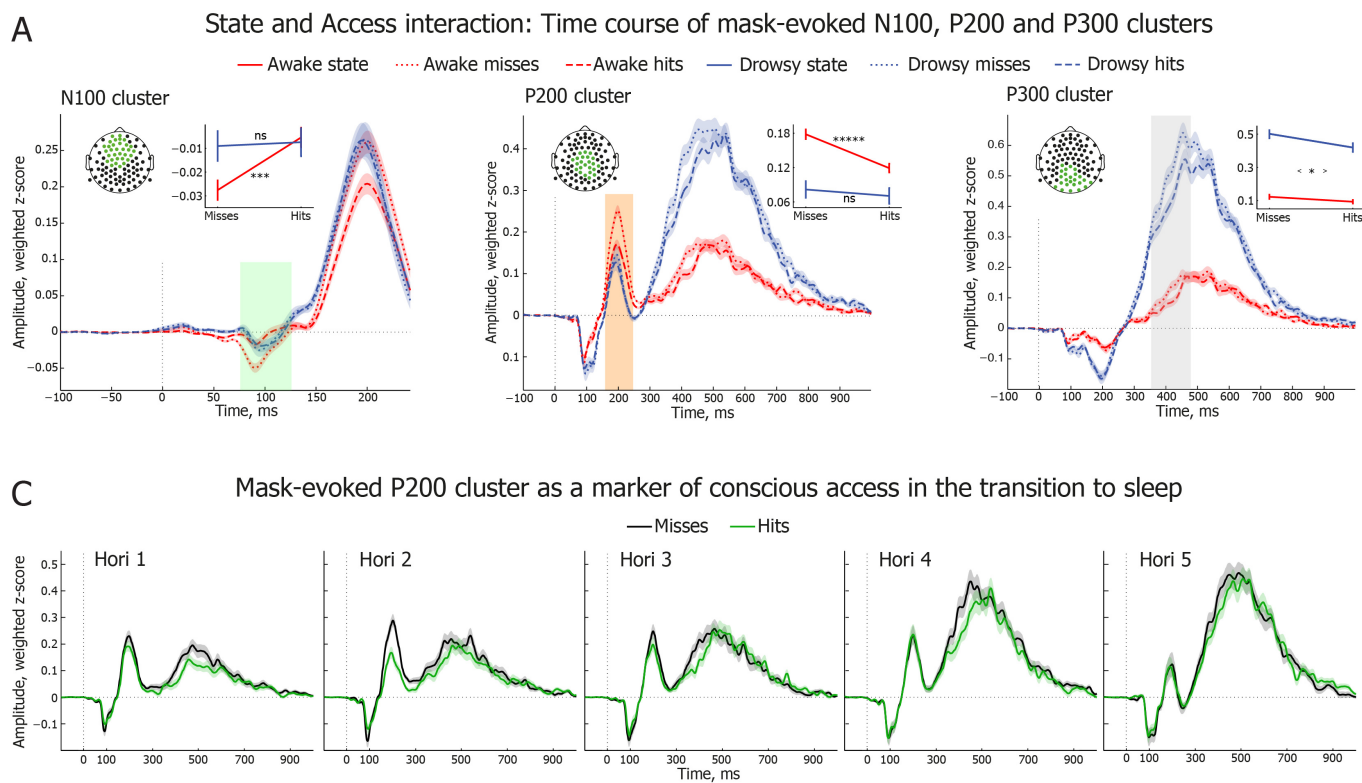

374  
 375 **Figure 5: Drowsiness modulates ERP clusters that signature suppression of conscious access. (A)** Interaction  
 376 plots of State (awake, drowsy) and Access (miss, hit) factors for the mask-locked N100, P200, and P300 clusters.  
 377 Waveforms are locked to the onset of mask (0 ms) and averaged across all cluster electrodes, which are depicted in  
 378 green in the electrode montage map. Individual trials are averaged separately for the four conditions: awake misses,  
 379 awake hits, drowsy misses, and drowsy hits. Shaded vertical bars indicate time windows that were used to calculate  
 380 the mean amplitude of N100 (green), P200 (orange) and P300 (grey) clusters. **(Left)** Mask-evoked N100 cluster  
 381 revealed a significant main effects of Access ( $F_{(1,3168)}=5.24, p=0.022$ ), and a significant State x Access interaction  
 382 ( $F_{(1,3168)}=3.887, p=0.049$ ), whereas the main effect of State was not significant ( $F_{(1,3168)}=2.55, p=0.11$ ). Misses had  
 383 higher amplitude than hits ( $t_{(3170)}=2.29, p=0.022, d=0.08$ ); however, this was observed only in awake trials  
 384 ( $t_{(1584)}=3.81, p=0.00015, d=0.19$ ), but not in drowsy trials ( $t_{(1584)}=0.19, p=0.85, d=0.01$ ).  $***p<0.0005$ . **(Middle)**  
 385 Mask-evoked P200 cluster revealed significant main effects of State ( $F_{(1,3168)}=39.45, p=0.00000$ ) and Access  
 386 ( $F_{(1,3168)}=9.3, p=0.0023$ ) and a significant State x Access interaction ( $F_{(1,3168)}=4.28, p=0.039$ ). Misses had higher  
 387 P200 amplitude than hits ( $t_{(3170)}=3.03, p=0.0025, d=0.11$ ), and this effect held for the awake trials  
 388 ( $t_{(1584)}=5.18, p=0.00000, d=0.26$ ), but not for the drowsy trials ( $t_{(1584)}=0.56, p=0.57, d=0.03$ ). Cluster amplitude was higher in  
 389 awake than drowsy states ( $t_{(2523.2)}=6.27, p=0.00000, d=0.25$ ).  $*****p<0.000005$ . **(Right)** Mask-evoked P300  
 390 cluster revealed significant main effects of State ( $F_{(1,3168)}=294.75, p=0.00000$ ) and Access ( $F_{(1,3168)}=7.43,$   
 391  $p=0.0064$ ), whereas the State x Access interaction was not significant ( $F_{(1,3168)}=1.67, p=0.197$ ). Cluster amplitude  
 392 was higher for misses than hits ( $t_{(3161)}=2.61, p=0.0092, d=0.09$ ; depicted as  $< * >$  in a subplot), and also it was higher  
 393 in the drowsy state compared to the awake trials ( $t_{(2185.9)}=17.15, p=0.00000, d=0.73$ ). **(B)** Non-linear dynamics of  
 394 mask-evoked P200 cluster for misses and hits across Hori Stages 1 to 5. Error bars in this figure indicate SEM.

395

396

397

## Reduction of cortical network underlying conscious access while falling asleep

398

399

400

401

402

403

404

405

406

407

408

409

410

411

412

413

414

415

416

417

418

419

420

421

422

423

424

425

426

427

We expected the suppression of auditory conscious access to involve wide broadcasting of masking noise within temporal and fronto-parietal nodes, which would spare no serial resources for the maintenance of a target tone (Dehaene & Changeux, 2011; Dehaene et al., 2014). Following previous research into fronto-parietal functioning during drowsiness (Olbrich et al., 2009; Picchioni et al., 2008), we further hypothesized that drowsiness will differentially modulate fronto-parietal network in critical stages of mask processing. To address these hypotheses, we carried out exploratory single-trial analysis by averaging activation of temporal and fronto-parietal sources locked to the onset of mask (see Fig 6A). The main effect of Access was observed in P200 ( $F_{(1,3168)}=5.47$ ,  $p=0.019$ ) and P300 ( $F_{(1,3168)}=5.1$ ,  $p=0.024$ ), but not in N100 ( $F_{(1,3168)}=0.16$ ,  $p=0.69$ ) time windows. Similar to the sensor-level statistics, analysis in the source space showed a significant State x Access interaction for the P200 cluster ( $F_{(1,3168)}=3.99$ ,  $p=0.046$ ), with misses having higher amplitude than hits in the Hori-awake ( $t_{(1563.8)}=3.98$ ,  $p=0.00007$ ,  $d=0.2$ ), but not in the Hori-drowsy ( $t_{(1584)}=0.2$ ,  $p=0.84$ ,  $d=0.01$ ) states of consciousness. Contrary to this, the States x Access interaction was not significant in the P300 time window ( $F_{(1,3168)}=0.00$ ,  $p=0.98$ ), with misses having higher P300 amplitude than hits ( $t_{(3170)}=2.09$ ,  $p=0.037$ ,  $d=0.07$ ) in both awake and drowsy trials. These findings confirm our earlier observation at the sensor level that the resolution of conscious access is delayed in drowsiness to the final P300 stage of mask processing, whereas an earlier target-mask interaction predicts if a target will be reported in awake trials.

To identify which of the 6 predefined regions of interest (left frontal, right frontal, left parietal, right parietal, left temporal, right temporal) show an expected increase of amplitude in misses compared to hits, we carried out planned  $t$  tests for each source and state of consciousness. In the P200 time window, the mask evoked higher activation of the bilateral temporal and the left parietal and frontal sources in the Hori-awake trials, whereas no differences between hits and misses were observed in Hori-drowsy trials (see Fig 6B, for temporal sources, see Supplementary Fig 6). That is, suppression of conscious access in the P200 time window depended on neuronal processing in both perceptual and fronto-parietal networks in the awake but not in the drowsy state. In the P300 time window, a higher amplitude in misses than hits was observed in the left parietal and bilateral frontal sources in the awake state, but only in the left frontal source in the drowsy state of consciousness (see Fig 6B). These findings indicate that in addition to the temporal restriction of neural markers, the neural network underlying reported awareness shrinks to a single left frontal node during transition to sleep, despite of a higher general activation.

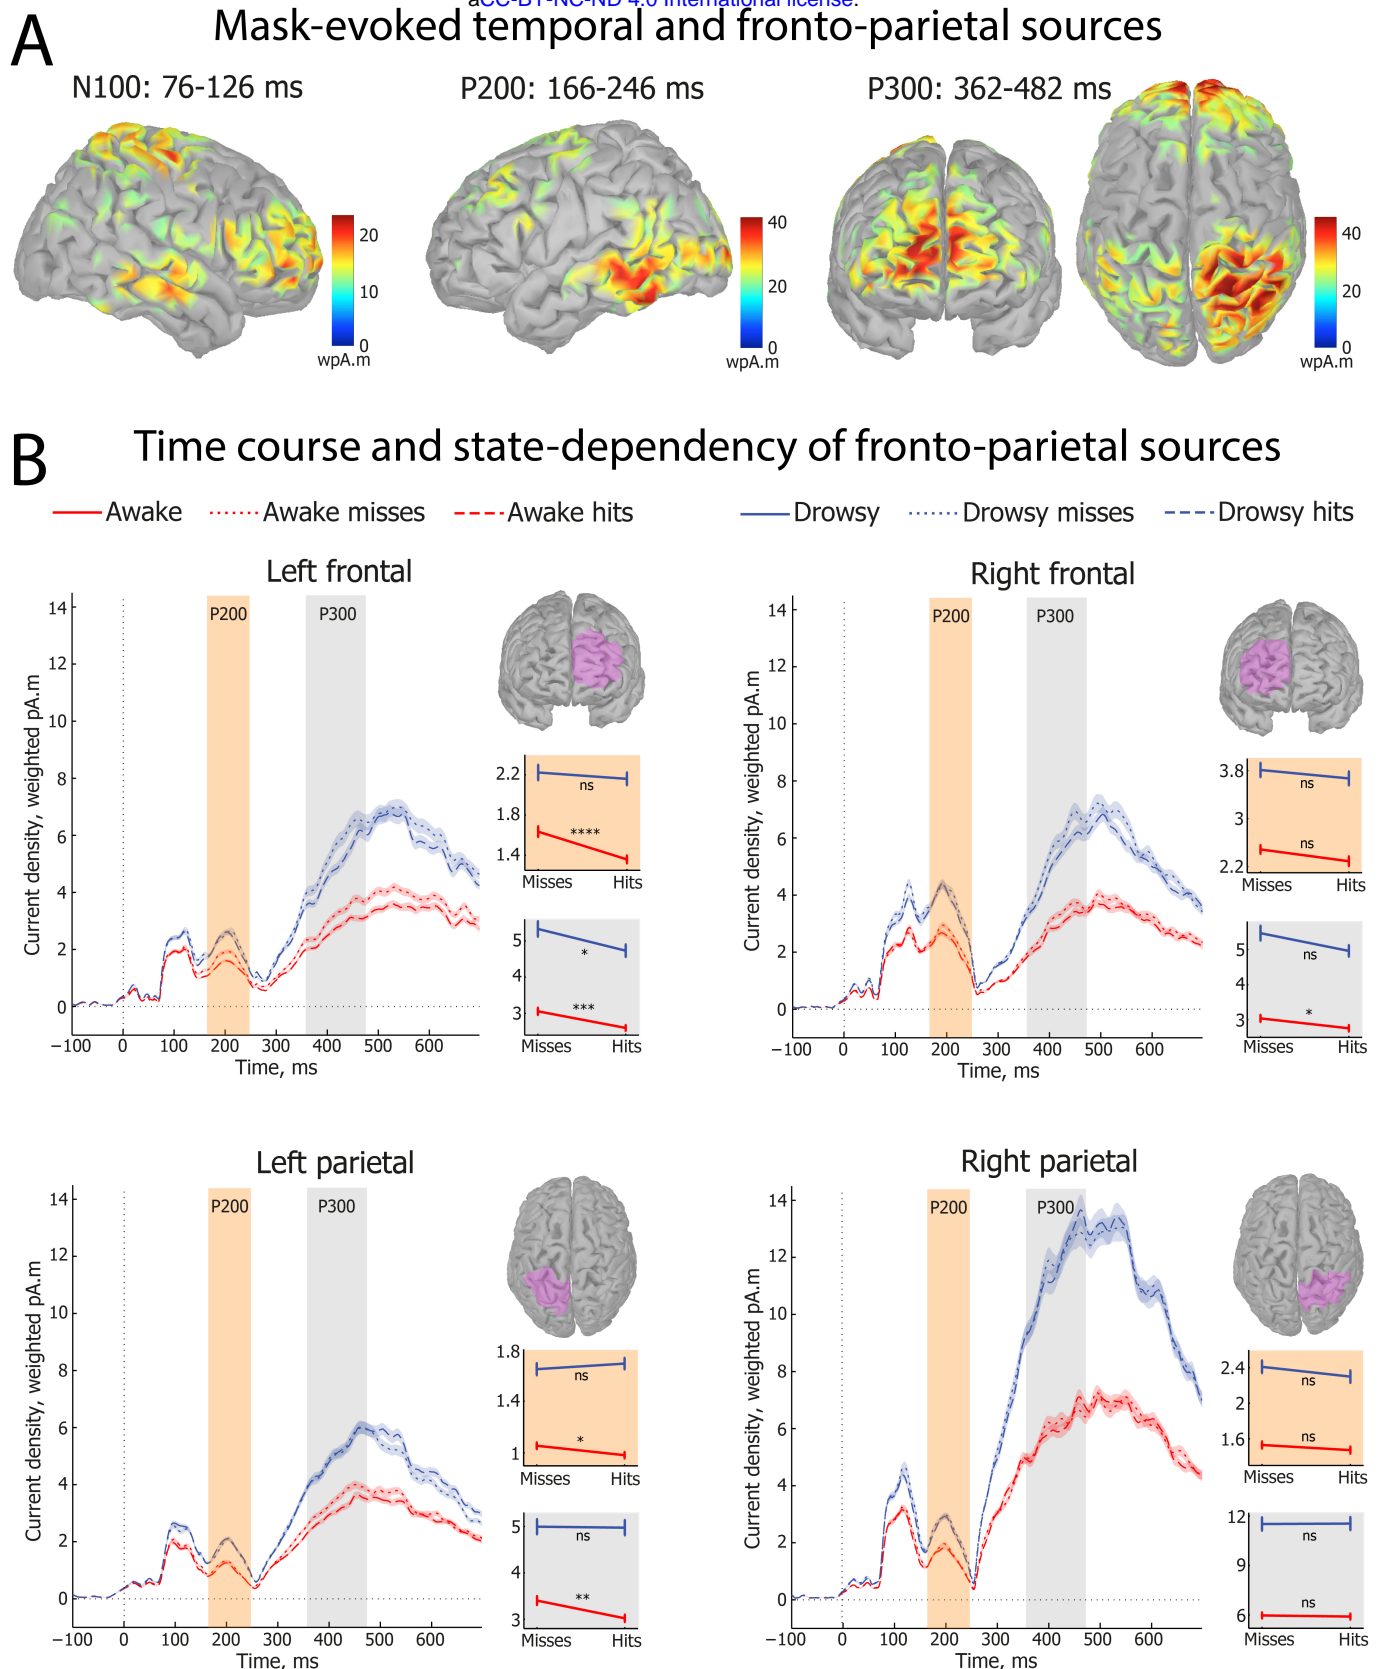

428  
429  
430  
431  
432  
433

**Figure 6: Fronto-parietal cortical sources of mask-evoked ERP clusters. (A)** Weighted minimum norm estimation (wMNE) of single trial sources averaged across all four conditions in the N100, P200 and P300 cluster time windows. N100 and P200 clusters were used to identify temporal lobe sources and P300 cluster revealed fronto-parietal sources of mask-evoked responses. A unit of dipole current density is weighted pico Ampere meter (wpA.m), i.e. the sources were modelled using weighted EEG data. **(B)** The planned *t* test comparisons of fronto-

434 parietal source activations between hits and misses in awake and drowsy states in P200 (orange) and P300 (grey)  
435 time windows. Waveforms indicate time courses of source activations, whereas statistical plots depict significance  
436 level of the planned comparisons within respective time windows: \* $p < 0.05$ , \*\* $p < 0.005$ , \*\*\* $p < 0.0005$ ,  
437 \*\*\*\* $p < 0.00005$ . Error bars indicate SEM. In the P200 time window, awake misses had higher amplitude than  
438 awake hits in the left frontal ( $t_{(1433.7)} = 4.32$ ,  $p = 0.000017$ ,  $d = 0.23$ ) and the left parietal ( $t_{(1584)} = 2.11$ ,  $p = 0.035$ ,  $d = 0.11$ )  
439 sources, and in the P300 time window, awake misses had higher amplitude than awake hits in the left frontal  
440 ( $t_{(1507.3)} = 3.72$ ,  $p = 0.00021$ ,  $d = 0.19$ ), the right frontal ( $t_{(1570)} = 2.16$ ,  $p = 0.031$ ,  $d = 0.11$ ), and the left parietal  
441 ( $t_{(1529.7)} = 3.15$ ,  $p = 0.0017$ ,  $d = 0.16$ ) sources. Drowsy misses had higher amplitude than drowsy hits in the P300 time  
442 in the left frontal source ( $t_{(1514.7)} = 2.22$ ,  $p = 0.027$ ,  $d = 0.11$ ).

## 444 DISCUSSION

445  
446 Our findings demonstrate that behavioural and neural markers of conscious access are state-dependent. In  
447 particular, we observed a more gradual interaction between the masking intensity and the rate of target  
448 detection when participants became drowsy compared to more abrupt conscious access dynamics in  
449 awake state. A more gradual build-up of evidence for conscious access (Sandberg, Bibby, Timmermans,  
450 Cleeremans, & Overgaard, 2011) in drowsiness may depend on the increased variance in the underlying  
451 neural processes that could produce a shallower response slope (Marreiros, Daunizeau, Kiebel, & Friston,  
452 2008). At the behavioural level, the increase of a hit rate in the most difficult trials with its simultaneous  
453 decrease in the easiest trials when the threshold point remains constant suggest detection instability in a  
454 proportion of drowsy trials. This finding implies that a steep detection slope (Antoine Del Cul et al., 2007)  
455 may not be a fundamental property of conscious access, but instead it can change as a function of arousal  
456 microstate before a stimulus appears. Thus, the opposing gradual (Elliott, Baird, & Giesbrecht, 2016) vs.  
457 non-gradual (Sergent & Dehaene, 2004) models of conscious access may not be mutually exclusive;  
458 instead, some aspects of their mismatch can be reconciled by adding a factor of a varying level of arousal,  
459 which may modulate attention and awareness (Chennu & Bekinschtein, 2012).

460 Drowsiness thus seems to provide a distinctive behavioural distortion of consciousness, which takes  
461 place during a period of rapid fronto-parietal reorganization (Olbrich et al., 2009; Picchioni et al., 2008),  
462 as further indicated by the increased P300 amplitude in the present study. It has been observed previously  
463 that neurological patients with prefrontal lesions have an increased threshold yet a stable slope of  
464 conscious access (A. Del Cul, Dehaene, Reyes, Bravo, & Slachevsky, 2009). Contrary to this, transition to  
465 sleep uncovered a unique case of a decreasing slope yet spared threshold of conscious access, which  
466 differs orthogonally from the earlier neurological observations (A. Del Cul et al., 2009). The possibility  
467 that either a slope or a threshold can be selectively modulated by a change of a brain state suggests that  
468 these two behavioural markers of consciousness are partially independent, further confirmed by the  
469 absence of their correlation in the present study.

470 At the electrophysiological level of analysis, we identified a sequence of evoked potentials that  
471 distinguished hits and misses across different stages of a complex target-mask interaction. In particular,  
472 hits were associated with higher amplitude of target-evoked potential in the N100 time window (peaking  
473 at 150 ms), replicating earlier ERP studies of auditory masking (Androulidakis & Jones, 2006; Gutschalk,  
474 Micheyl, & Oxenham, 2008; Parasuraman & Beatty, 1980). Given that the N100 marker of auditory  
475 detection is generated in the auditory cortex (Gutschalk et al., 2008), our finding provides support to the  
476 'early' sensory NCC accounts of conscious access (Boehler et al., 2008; Railo et al., 2011). In the later  
477 stages of target-mask interaction, the initial representation of target was suppressed by mask-evoked  
478 N100, P200, and P300 potentials. Thus, in addition to the previous report that misses have higher P200  
479 amplitude (Makeig, Jung, Bell, Ghahremani, & Sejnowski, 1997), we show that mask evoked activity  
480 interferes with conscious access at each of the perceptual (N100), perceptual-central (P200), and central  
481 (P300) stages of information processing.

482 After splitting the EEG data between awake and drowsy trials, we found evidence that EEG markers  
483 of conscious access are also state-dependent. In particular, the graduality of mask-evoked N100 response  
484 across 11 gap conditions in the awake state was shifted to the P200 time window when participants



485 became drowsy. This finding suggests that the drowsy brain requires the involvement of central resources  
486 for the distinction between two serially presented stimuli. Arguably, delayed processing of the target-  
487 mask interaction may also contribute to the decreasing sigmoidal slope of conscious access in drowsiness.

488 The sluggishness of EEG response in drowsiness was also observed when interaction between  
489 conscious access (hits, misses) and state (awake, drowsy) was studied in the sensor as well as the source  
490 space. While target-evoked N100 had higher amplitude in hits than in misses in both states of  
491 consciousness, mask-evoked suppression of conscious access occurred only in P300 time window in  
492 drowsiness compared to significant effects observed in mask-evoked N100, P200 and P300 time windows  
493 in the awake state of consciousness. Conscious access was thus associated with a decreased response to  
494 mask, i.e. a higher resistance to the interfering sound, in all three stages of processing in the awake but not  
495 in the drowsy state of consciousness. Notably, mask evoked N100 and P200 potentials had relatively low  
496 amplitude compared to P300 potentials in drowsiness (see Fig. 5C), and likewise neuronal processes that  
497 distinguished hits and misses were resolved in the time window of the largest ERP response. These  
498 observations seem to point to the multiple realization of the NCC(Chalmers, 2000) in different states  
499 within the same participants. That is, the neural markers of consciousness and its suppression appear to be  
500 flexible and dependent on the overall state of the brain, and an NCC observed in one state may not hold  
501 for another state of consciousness. Alternatively, a possibility cannot be ruled out that the subjective  
502 quality of auditory awareness differed between awake and drowsy states, which may have involved  
503 correspondingly different NCC(Overgaard & Mogensen, 2011).

504 Despite state-dependent differences in the association between conscious access and N100 / P200  
505 clusters, the final P300 stage of the neuronal cascade towards conscious access distinguished hits and  
506 misses in both states of consciousness. Source modelling of P300 revealed a fronto-parietal activation that  
507 likely reflects global broadcasting of suppressive masking noise(Dehaene & Changeux, 2011). While  
508 three of the four P300 sources distinguished aware and unaware trials in awake trials – the left and right  
509 frontal and the left parietal cortex – only the left frontal source showed a higher activation in misses than  
510 hits in drowsiness. Interestingly, patients with lesions in the left compared to the right prefrontal cortex  
511 also show stronger suppression of conscious access(A. Del Cul et al., 2009). The left frontal component of  
512 the global broadcasting network appears to be critical for the conscious access, and is the last one to  
513 survive a state of decreasing level of arousal.

514 Previous attempt to study conscious access in different states relied on pharmacological  
515 intervention(van Loon, Scholte, van Gaal, van der Hoort, & Lamme, 2012). Transition to sleep provides a  
516 fruitful naturally occurring alteration of the state of consciousness with a preserved capacity to respond,  
517 which can be utilized to study the modulation of conscious access by a changing brain-state. Such natural  
518 fluctuation of the level of alertness may also occur unintentionally and go undetected(Tagliazucchi &  
519 Laufs, 2014), which may hinder or distort neural markers of conscious access if left uncontrolled.

520 Our study indicates that configuration of neural processing stages underlying cognitive performance  
521 may fluctuate within the same participant at a rapid rate within a single session of experiment. Yet,  
522 despite decreased level of wakefulness, responsive participants can maintain their goal-set to report  
523 auditory awareness, demonstrating flexibility of human brain to adapt to increasing levels of both  
524 exogenous (masking) and endogenous (arousal) noise. We have previously shown that individuals  
525 maintain capacity to categorize semantic categories of words even during NREM sleep(Kouider,  
526 Andrillon, Barbosa, Goupil, & Bekinschtein, 2014), although it remained uncertain if they were aware of  
527 presented stimuli. In the present study, participants were conscious in both awake and drowsy trials,  
528 revealing that different modes of evidence accumulation, such as a decreased behavioural slope and ERP  
529 reconfiguration in drowsiness, can underlie conscious access in different states of consciousness. We thus  
530 conclude that a comprehensive model of conscious access should include an independent factor of the  
531 state of wakefulness, and that access NCC should not be studied in isolation of state NCC(Noreika, 2015).

532  
533  
534  
535

536

537

## ONLINE METHODS

538

539

540

541

542

543

544

545

546

547

548

549

550

551

552

553

554

555

556

557

558

559

560

561

562

563

564

565

566

567

568

569

570

571

572

573

574

575

576

577

578

579

580

581

582

583

**Participants.** 56 participants (23 male; mean age 26.9; age range 19-39) signed informed consent and took part in the study. Inclusion criteria were being 18 to 40 years old, having no history of hearing impairment or injury and no neurological or psychiatric disorders, and being right handed, which was assessed with the Edinburgh Handedness Scale (Oldfield, 1971). In order to recruit individuals who are likely to become drowsy and fall asleep in a suitable setting during daytime, potential participants were screened with the Epworth Sleepiness Scale (Johns, 1991), aiming to have a minimum daytime sleepiness score of 7. Given the difficulty in carrying out a very demanding auditory detection task for a long period of time (2 hours) in a drowsy state of mind, a large proportion of participants failed to maintain a sufficient level of accuracy throughout the session, e.g. their false alarm rate was more than 50% in catch trials, and/or sigmoid function could not be fitted to their responses, especially in a drowsy state of consciousness (see Section 3.1). These participants were excluded from the analyses reported here, and the final sample consisted of 31 participants (9 male; mean age 27.4; age range 20-39). Notably, the excluded participants reached a deeper level of drowsiness as measured by the intra-individual mode of Hori scores of sleepiness (see Section 2.4.1; inter-individual Mode=5; Range=4) than the remaining participants (inter-individual Mode=2; Range=4; Mann-Whitney U:  $Z=2.23$ ;  $p=0.026$ ). Thus, it is likely that the failure to maintain a sufficiently high level of response accuracy was due to a deep level of sleepiness. Interestingly, the excluded participants were also more likely to be male (Pearson  $\chi^2=4.16$ ,  $p=0.041$ ), who are generally known to have shorter sleep latency than female adults (Tsai & Li, 2004).

The experimental protocol was approved by the Cambridge Psychology Research Ethics Committee (2012.15), and the study was carried out in accordance with the Declaration of Helsinki. Participants were recruited through the electronic volunteer database of the MRC Cognition and Brain Sciences Unit by posting an online advertisement about the study. They received £30 for taking part in the study.

**Experimental design.** After signing informed consent, participants filled in the handedness and sleepiness questionnaires, and were seated in a shielded chamber of the EEG lab. While placing the EEG net, participants were instructed that they will have to attend to sounds and report if they have heard a target sound, i.e. a tiny beep, which may or may not occur before a masking sound of noise. Notably, this was not a forced-choice task and participants were not asked to guess if there was a target or not; instead, they were instructed to report if they could hear the target (an “aware” or a “hit” trial) or not (an “unaware” or a “miss” trial). Once the EEG net was applied, participants laid in a fold-back chair in a relaxed position with eyes closed in a dark room. First, a behavioural staircase experiment was carried out in order to estimate individual threshold, i.e. a minimal duration of a silent gap between the target and masking sounds required for the detection of targets. Next, the main EEG experiment was carried out using the individual threshold that was estimated during the behavioural task. Auditory stimuli were presented binaurally using Etymotics ER-3A earphones, and the volume of sound was individually adjusted at a comfortable level.

**Behavioural staircase procedure.** During behavioural experiment, a series of masked target sounds were played, and participants responded each time if they could hear the target or not (for the trial structure, see Fig 1A). Each trial began with a target stimulus (10 ms; 1000 Hz; fade-in and fade-out: 2.5 ms each; attenuation: -24 Db), followed by a masking noise (300 ms; fade-in and fade-out: 5 ms; attenuation: 0 Db). The frequency range of the masking sound ( $FM$ ) was octave wide around the frequency of the target sound ( $FT$ ) (707.1-1414.2 Hz):

$$FM = \left(\frac{FT}{\sqrt{2}}\right) : (FT * \sqrt{2})$$

584 The target and the masking sounds were separated by a changing interval of silence, which was the  
585 main independent variable in this experiment. 1000 ms after the offset of the masking noise, a second 10  
586 ms beep, identical to the target (1000 Hz; fade-in and fade-out 2.5 ms; attenuation: -24 Db), was presented  
587 after which the participant had 5 s to respond by pressing one of the two response keys whether they have  
588 heard the target stimulus using a keyboard. To avoid a possible inter-trial variability in the relative timing  
589 of the stimuli, all sounds (i.e. target, mask, response cue) and intervals of silence were created and played  
590 within each trial as a single continuous clip of audio.

591 Half of the participants responded with the right hand button if they could hear the target and with  
592 the left if they could not, whereas the response keys were reversed for the other half of participants in  
593 order to account for possible lateralization effects in reaction times between the dominant and non-  
594 dominant hand responses(Kerr, Mingay, & Elithorn, n.d.). After a response, or the end of a 5 s response-  
595 free period in a case of an omission, there was a 8-12 s pause until the presentation of the next target tone.  
596 The inter-trial interval was relatively long in order to allow for drowsiness to develop, which is more  
597 difficult to achieve if a task is speeded. Participants were instructed that a target sound will not always be  
598 presented, and they did not know that in fact all trials had a target sound, i.e. there were no catch trials  
599 during the behavioural staircase experiment.

600 The first trial always had a detectable target with the masking noise presented after a 400 ms gap,  
601 which was considerably longer than the highest threshold among our participants (see below). For the  
602 following trials, a simple up-down staircase procedure was applied to determine a required gap between  
603 the target and masking sounds(von Békésy, 1947). That is, the gap was increased if participants were  
604 unaware of the target, making the next trial easier, and it was increased if participants could hear the target  
605 sound, making the next trial more difficult. The staircase procedure continued until 12 reversals of the  
606 change of gap. Until the fourth reversal, the gap duration changed by a factor of 2, and afterwards, until  
607 the 12th reversal, it changed by a factor of  $\sqrt{2}$ . Threshold was calculated as an arithmetic mean of the gap  
608 values during the last 8 reversals. The same staircase procedure was repeated twice, and the mean  
609 threshold of these two blocks was used for the main EEG experiment. For the behavioural experiment, the  
610 stimuli were created and the staircase procedure was controlled by the Psychoacoustics toolbox(Soranzo  
611 & Grassi, 2014) running in Matlab (R2011b) on a MacBook Pro.

612 Staircase procedure revealed a high variability of auditory threshold, i.e. the silent interval between  
613 the target and masking sounds required to hear the target, across participants (M=71.03 ms, SD=55.58,  
614 Min=6.67 ms, Max=202.4 ms). Nevertheless, despite individual differences, almost identical thresholds  
615 were estimated in both blocks of the behavioural experiment (Block 1: M=67.75, SD=52.85; Block 2:  
616 M=74.31, SD=61.50; Pearson's  $r = 0.89$ ,  $p < 0.000001$ ), confirming the high reliability of the staircase  
617 procedure.

618  
619 **Stimuli during EEG experiment.** During the main EEG experiment, the same auditory stimuli  
620 were presented as in the behavioural staircase procedure, except that the interval ( $T$ ) between the target  
621 stimulus and the noise, which varied now around the participant's individual threshold ( $T_0$ ). 11 different  
622 interval conditions were calculated via:

$$623$$
$$624 \quad T = I * T_0$$
$$625$$

$$626 \quad I = [0, 0.25, 0.5, 0.75, 0.875, 1, 1.125, 1.25, 1.5, 1.75, 2]$$
$$627$$

628 Additionally, a 12<sup>th</sup> 'catch trial' condition in which there was no target stimulus was presented in order to  
629 assess the false alarm rate of each participant. The three conditions centred around an individual  
630 participant's threshold ( $T = [0.875, 1, 1.125] * T_0$ ) were four times more likely to be presented in  
631 comparison to the other gap conditions and catch trials. All trials were presented in a random order.  
632 Stimuli were generated within each trial using Psychoacoustics toolbox(Soranzo & Grassi, 2014) and the  
633 whole experiment was programmed and controlled using Psychtoolbox version 3(Brainard, 1997) running

634 in Matlab (R2011b) on a MacBook Pro. Participants were instructed to respond using the same keys as  
635 during the behavioral staircase experiment. They were also explicitly told that they are allowed to fall  
636 asleep if they want to. The maximal duration of data collection during EEG experiment was 120 min;  
637 however, the experiment was terminated earlier if a participant became too tired or uncomfortable. On  
638 average, 501 trials were run per participant (SD=65, Min=361, Max=604).

639  
640 **EEG acquisition and preprocessing.** 129-channel EEG data, sampled at 500 Hz and referenced to the  
641 vertex, were recorded with the Net Amps 300 amplifier (Electrical Geodesics Inc., Oregon, USA).  
642 Conductive gel was applied to each electrode to ensure that the impedance between the scalp and  
643 electrodes was kept below 100 k $\Omega$ . For the data preprocessing and analyses, EEG channels over forehead,  
644 cheeks, and neck were excluded to minimise the influence of eye- and muscle-related noise, retaining 92  
645 channels that covered the scalp. Continuous EEG data were then filtered (high pass: 0.5 Hz; low pass: 40  
646 Hz) and re-referenced to the average of all channels. Afterwards, data were epoched around the onset of  
647 the target sound (-4000 ms to 6000 ms) and baseline corrected to the 100 ms preceding the target  
648 stimulus. The first 5 trials were deleted for each participant, thereby excluding an approximately 1 min  
649 period during which participants often moved in the chair till they settled into a comfortable position. The  
650 remaining extremely noisy epochs and EEG channels were manually deleted before running the  
651 independent component analysis (ICA) for the final removal of artefacts (such as eye blinks and saccades,  
652 heart beat, sweating, etc.). ICA was carried out on relatively clean channels only, and the noisy channels  
653 were recalculated by spherical spline interpolation of surrounding channels after deleting ICA components  
654 with artefacts. On average, 38 trials (7.6%) were deleted per single participant during EEG pre-  
655 processing, and there were on average 463 trials per participant (SD=60, Min=345, Max=584) available  
656 for further EEG analyses. Data pre-processing was carried out using EEGlab toolbox for Matlab(Delorme  
657 & Makeig, 2004).

658  
659 **Hori-measure of drowsiness.** Given that there is no single widely accepted measure of drowsiness in  
660 cognitive experiments, three complementary measures were used to assess the depth of transition from  
661 waking to sleep: Hori scoring system, EEG theta/alpha power, and reaction times (RT). A clinical Hori-  
662 measure of drowsiness is based on visual scoring of 4 sec segments of continuous EEG recording(Hori et  
663 al., 1994). In Hori system, Stage 1 indicates alpha-dominated relaxation, Stage 9 is marked by complete  
664 spindles that coincide with a classical Stage 2 NREM sleep, and other stages in-between reflect the  
665 gradual progression of sleep onset and the slowing down of dominating EEG frequencies (see Fig 1B).  
666 Sequential analysis of the progression of Hori stages during uninterrupted transition from wakefulness to  
667 sleep confirms the validity of the rank order of these stages(Tanaka, Hayashi, & Hori, 1996). In addition,  
668 several studies showed systematic ERP and EEG spectral power changes throughout the Hori-defined  
669 progression of sleep onset(Nittono, Momose, & Hori, n.d.; Tanaka, Hayashi, & Hori, 1997). For instance,  
670 amplitude of mismatch negativity (MMN) decreases from Hori Stages 1 to 3 and then changes its polarity  
671 from Hori Stages 4 to 9(Nittono et al., n.d.), whereas the peak regions of EEG alpha power move from  
672 posterior to anterior regions of scalp with an increasing depth of transition(Tanaka et al., 1997). Finally,  
673 reaction times as well as the rate of subjective reports of being asleep steadily increase from Hori Stages 1  
674 to 9(Hori et al., 1994), corroborating the use of this system to measure the depth of drowsiness in humans.

675 In the present study, Hori stages were visually assessed over 4 sec epochs of pre-stimulus period  
676 (see Fig 1A) by two experienced raters, who were blind to the response type (hit, miss, or unresponsive)  
677 of each particular trial. For scoring purposes, EEG recordings were low pass filtered (20 Hz), and only 21  
678 EEG channels of the standard 20-10 system were evaluated. In a case of a disagreement (which occurred  
679 on 13.2% of trials, usually between any two adjacent stages), the raters discussed the difference until an  
680 agreement was achieved. For the EEG analyses, “Hori-awake” trials were defined as Hori Stages 1 and 2,  
681 dominated by alpha waves, and trials scored as Hori Stages 4 and 5, dominated by the slower theta waves,  
682 were regarded as “Hori-drowsy”.

683 While being perhaps the most accurate electrophysiological assessment of the level of sleep onset  
684 progression(Ogilvie, 2001), the use of Hori system in cognitive neuroscience experiments is however

685 limited by the unpredictable proportion of different stages within an individual participant. In our dataset  
686 of 31 participants, distribution of Hori scores ranged from participants having mostly Stage 1 epochs to  
687 participants with mostly Stage 5 trials (see Fig 1C), rendering within-participant comparisons between  
688 awake and drowsy trials difficult to perform. In such cases, trials of different participants could be  
689 grouped by Hori score and merged into a single dataset, following which analysis could be carried out at a  
690 single trial level, under the assumption that the variation in the relative contribution of individual  
691 participants to each Hori score does not contribute significantly to the variance between experimental  
692 conditions of interest. An alternative approach would be to carry out analyses at individual participant  
693 level following other measures of drowsiness that enable equal division of trials across arousal conditions,  
694 such as theta/alpha- or RT-based measures of drowsiness.

696 **Theta/alpha-measure of drowsiness.** Given that Hori Stages 1 to 4 are marked by a decreasing alpha  
697 range activity, whereas Stages 4 to 8 have an increasing theta range activity (Hori et al., 1994) (see Fig  
698 1B), progression of drowsiness can be quantified by the spectral power of respective EEG frequency  
699 bands. That is, drowsiness can be defined as a period of time with an increased theta and a decreased  
700 alpha band power, or – by combining these two measures – as a period of an increased ratio of theta/alpha  
701 ( $\theta/\alpha$ ) power. After calculating theta/alpha ratio for each trial within an individual participant, data can be  
702 divided into equal number of “awake” and “drowsy” trials, this way maximizing power of neurocognitive  
703 contrasts between these states of consciousness (C. A. Bareham, Bekinschtein, Scott, & Manly, 2015; C. A.  
704 Bareham et al., 2014).

705 To apply  $\theta/\alpha$  measure of drowsiness in the present study, spectral power of EEG frequency  
706 oscillations was computed every 4 ms between -2444 ms to 2444 ms in respect to the onset of a target  
707 tone using continuous wavelet transform, set from 3 cycles at 3 Hz to 8 cycles at 40 Hz. Theta (4-7 Hz)  
708 and alpha (8-12 Hz) power was then averaged individually for each trial from -2000 ms to 0 ms and a  
709 theta/alpha ratio was calculated for each electrode. Finally, theta/alpha power was averaged across all  
710 electrodes, resulting in a single “sleepiness” value per trial. Trials were then split between the most “ $\theta/\alpha$ -  
711 awake” and the most “ $\theta/\alpha$ -drowsy” trials, separately for each gap condition. Two data splits were used for  
712 each individual participant: a thirds’ split between 33% of the most “awake” and 33% of the most  
713 “drowsy” trials ( $\theta/\alpha$ -33%), and a median split between 50% of the most “awake” and 50% of the most  
714 “drowsy” trials ( $\theta/\alpha$ -50%). Arguably,  $\theta/\alpha$ -33% measure could avoid uncertain intermediate trials, whereas  
715  $\theta/\alpha$ -50% measure could maximize on the available number of trials.

717 **RT-measure of drowsiness.** We also used reaction times (RT) as a behavioural measure of sleepiness  
718 that may reflect the depth of drowsiness at the moment of response execution rather than several seconds  
719 before the presentation of stimuli (see Fig 1A). Typically, reaction times are prolonged in a state of low  
720 vigilance (Buck, 1966; Schmidt et al., 2009), increased drowsiness (Hori et al., 1994; Ogilvie & Wilkinson,  
721 1984), and after sleep deprivation (Blatter et al., 2006; Lim & Dinges, 2010; Ratcliff & Van Dongen,  
722 2011). Arguably, the speed of processing may become slower in the drowsy state at any stage of  
723 information processing: sensory processing, stimuli recognition and categorization, decision-making,  
724 motor preparatory processes, and/or execution of motor commands. To narrow down a potential variance  
725 of RT-measure of drowsiness to the motor processes, a response cue was presented indicating a time to  
726 respond (see Fig 1A). Assuming that a 1000 ms period from the offset of mask to the onset of response  
727 cue was sufficient to make a response decision, RT was interpreted as reflecting a period required for a  
728 motor plan and its execution.

729 Importantly, some conflicting evidence from traffic psychology shows no association between RT  
730 and sleepiness (Baulk, Reyner, & Horne, 2001) or sleep debt (Philip, Taillard, Quera-Salva, Bioulac, &  
731 Åkerstedt, 1999). We thus employed the RT-measure of drowsiness with a caution, treating it as a  
732 complimentary rather than a central measure in the analyses reported below. Similarly to the  $\theta/\alpha$ -based  
733 split between “awake” and “drowsy” states, trials were separated for each gap condition within each  
734 participant into the fastest third of RTs and the slowest third of RTs (RT-33%). In addition, a similar split

735 around the median RT separated data into a half of “awake” trials with the fastest RT and another half of  
736 “drowsy” trials with the slowest RTs (RT-50%).

737

738 **Agreement between different measures of drowsiness.** Where possible, Hori measure of drowsiness  
739 was preferred over the  $\theta/\alpha$ - and RT- measures because its absolute electrophysiological signatures of the  
740 transition from wakefulness to sleep can be identified within each participant. When psychophysical  
741 analyses required equal number of “awake” and “drowsy” trials within each participant (see Section 2.4),  
742 we considered following  $\theta/\alpha$ - and RT- measures of drowsiness that allowed such splits of data. As a  
743 downside, these measures are relative and even if all trials would be of Hori Stage 1, one third (or half) of  
744 them would still get scored as “drowsy”. Thus, aiming to verify the use of  $\theta/\alpha$ - and RT- data splits, we  
745 compared all three measures at an individual as well as at a group level.

746 First, we carried out correlation analyses between any two measures of drowsiness within each  
747 participant, using a raw Hori,  $\theta/\alpha$  or RT score of all trials within a session, i.e. without splitting them into  
748 “awake” and “drowsy” categories (see Fig 1D). Only responsive trials were used for correlations  
749 involving RT. Second, we compared correlation coefficients against zero, aiming to assess a consistency  
750 of an association between any two measures of drowsiness at a group level (see Fig 1E). Hori and  $\theta/\alpha$ -  
751 measures were positively and significantly correlated for all 31 participants (individual rho ranged from  
752 0.39 to 0.88). Group analysis confirmed a very strong association between these two electrophysiological  
753 measures of drowsiness (one sample t test:  $t_{(30)}=26.16$ ,  $p<0.000005$ ), confirming that  $\theta/\alpha$  can be used  
754 reliably to assess the level of drowsiness. Contrary to this, correlation coefficients between Hori and RT-  
755 measures were less consistent (from -0.15 to 0.41) and significant only in 16 out of 31 participants.  
756 Similarly, correlation coefficients between  $\theta/\alpha$ - and RT- measures ranged from -0.14 to 0.41. While group  
757 level analyses showed a significant association between Hori scores and RTs ( $t_{(30)}=3.75$ ,  $p=0.001$ ) as well  
758 as between  $\theta/\alpha$  and RTs ( $t_{(30)}=4.12$ ,  $p=0.00028$ ), we further treated RT as a complementary rather than a  
759 central measure of drowsiness as it was not reliable at a single participant level.

760

761 **Behavioural analyses.** We aimed to investigate conscious access in awake and drowsy trials by fitting  
762 two different models, a sigmoid function and a linear function, and comparing threshold and slope  
763 measures. The auditory detection in awake and drowsy trials was first investigated by fitting a sigmoid  
764 function to the ratio of hits to misses (constrained from 0 to 1 on the y axis) across 11 gap conditions and  
765 comparing the threshold and slope measurements between the states of consciousness in each participant  
766 separately:

767

$$F = \frac{1}{1 + e^{-\frac{x-\mu}{s}}}$$

768

769 where  $F$  is the hits ratio,  $x$  is the gap condition,  $\mu$  is the threshold value (the gap condition at the inflection  
770 point), and  $s$  is inversely proportional to the slope at the threshold. The sigmoid was fit using the Signals  
771 Approach Toolbox for Matlab (Spencer Lynn, <http://code.google.com/p/satb/>).

772 In order to investigate whether conscious access remained non-linear in the drowsy state, the data  
773 were also fitted to a linear function:

774

$$F = mx + c$$

775

776 where  $F$  is the predicted hits ratio,  $x$  is the gap condition,  $m$  is the slope, and  $c$  is the point at which the  
777 line crosses the y axis.

778 The goodness of fit was compared for each model in each state of consciousness. As both fitting  
779 functions contained the same number of free parameters, 2, the models were compared using the  $R^2$  values  
780 given by:

781

$$R^2 = 1 - \frac{\sum_x (\gamma_x - f_x)^2}{\sum_x (\gamma_x - \bar{f})^2}$$

782

783

784

785

786

where  $\gamma_x$  is the hits ratio measured for each gap condition  $x$ ,  $f_x$  is the predicted hit ratio given by the model, and  $\bar{f}$  is the mean hits ratio measured over all gap conditions.  $R^2$  varies from 0 to 1 with 1 indicating a perfect fit to the data.

787

788

789

790

791

792

793

794

795

796

797

**Spatio-temporal ERP clustering.** To identify neural signatures of conscious access and its inhibition, auditory ERP dynamics were studied using data-driven spatiotemporal clustering analysis similar to what we previously described (Chennu et al., 2013). Time windows of interest were compared between hits and misses at a single trial level, i.e. by concatenating individual datasets without participant-level averaging. While participant-level averaging is typically performed to contrast independent experimental conditions, a single trial-level analysis is arguably more appropriate when trials of independent conditions fluctuate spontaneously and their count cannot be pre-determined within- and between-participants, such as during rapid transitions between awake and drowsy states (see Fig 1D). To narrow down possible physical variance between the stimuli, only trials corresponding to gap conditions close to participant-wise thresholds ('-12.5%', '0%', '+12.5%') were subjected to ERP clustering. Furthermore, ERP clustering was limited to trials of Hori stages 1-5, as ERP topography tended to change in Hori stages  $\geq 6$ .

798

799

800

801

802

803

804

805

806

807

808

809

810

Using functions of FieldTrip toolbox (Maris & Oostenveld, 2007; Oostenveld, Fries, Maris, & Schoffelen, 2011), we compared corresponding spatiotemporal points in individual awake and drowsy trials with an independent samples  $t$  test. Although this step was parametric, FieldTrip used a nonparametric clustering method (Bullmore et al., 1999) to address the multiple comparisons problem.  $t$  values of adjacent spatiotemporal points with  $p < 0.05$  were clustered together by summing them, and the largest such cluster was retained. A minimum of two neighbouring electrodes had to pass this threshold to form a cluster, with neighbourhood defined as other electrodes within a 4 cm radius. This whole procedure, i.e., calculation of  $t$  values at each spatiotemporal point followed by clustering of adjacent  $t$  values, was repeated 1000 times, with recombination and randomized resampling before each repetition. This Monte Carlo method generated a nonparametric estimate of the  $p$  value representing the statistical significance of the originally identified cluster. The cluster-level  $t$  value was calculated as the sum of the individual  $t$  values at the points within the cluster. Spatiotemporal clustering was always carried out within a restricted time window around the ERP peak of interest (P50, N100, P200, or P300).

811

812

813

814

815

816

817

First, a butterfly plot of trials locked to the onset of mask and taken together from all participants ( $N=31$ ) revealed 3 prominent peaks at 92 ms, 196 ms, and 528 ms after the onset of mask (see Fig 3A). Based on their topography and latency, the peaks were identified as N100, P200 and P300 potentials (see Fig 3A). Afterwards, hits ( $N=3442$ ) and misses ( $N=3277$ ) were subjected to spatiotemporal ERP clustering around the time window of each individual peak, namely a  $\pm 50$  ms time window around the 92 ms peak for N100 potentials, a  $\pm 50$  ms time window around the 196 ms peak for P200 potentials, and a  $\pm 250$  ms time window around the 528 ms peak for P300 potentials.

818

819

820

821

822

823

824

825

826

827

To isolate relatively early responses to the target, EEG data were selected from 10 participants who showed the highest thresholds in the behavioural staircase experiment ( $M=139.66$  ms,  $SD=35.86$  ms, range: 83.55-202.4 ms). Given that for these participants the masking noise was presented on average 140 ms after the onset of the target, and assuming that the earliest responses to the mask would arise around  $> 30$  ms after its onset (see Fig 3A), we expected that potentials in a time window  $< 170$  ms will be driven by the target sound. When trials of these 10 participants were grouped together, a butterfly plot of hits and misses revealed two prominent peaks at 50 ms and 116 ms (see Supplementary Fig 3A). Trials were then separated between hits ( $N=1527$ ) and misses ( $N=842$ ), and data-driven clustering at a single-trial level was carried out separately in a  $\pm 25$  ms time window around the P50 peak, and in a  $\pm 50$  ms time window around the N100 peak.

828 **ERP conditioning and normalization.** Following spatio-temporal clustering, neuronal responses to the  
829 mask between awake and drowsy trials were compared across 11 gap conditions. For this, awake and  
830 drowsy datasets were created by concatenating corresponding trials of all 31 participants. Next, trial  
831 counts were matched between awake and drowsy datasets by deleting randomly selected trials from the  
832 awake condition. The following numbers of trials were obtained across 11 gap conditions: 193, 191, 180,  
833 164, 721, 726, 739, 188, 170, 194, and 203 trials in each state of consciousness. To contrast neural  
834 markers of hits and misses in awake and drowsy states, four datasets were created to study target-evoked  
835 N100 by appending trials of 10 participants who had the highest target detection threshold: awake misses  
836 (N=363), awake hits (N=931), drowsy misses (N=319) and drowsy hits (N=320). All four conditions were  
837 matched to have 319 trials each by deleting randomly selected trials from the awake misses, awake hits  
838 and drowsy hits conditions. Similarly, four single-trial datasets were created to study mask-evoked N100,  
839 P200 and P300 components, this time appending trials of all 31 participants: awake misses (N=1593),  
840 awake hits (N=1759), drowsy misses (N=793) and drowsy hits (N=803). All four conditions were then  
841 matched to have 793 trials each by deleting randomly selected trials from the awake misses, awake hits  
842 and drowsy hits conditions.

843 To normalise within-trial variance, raw voltage of each individual trial was transformed to z-scores  
844 using the mean and standard deviation of the baseline period (-100 to 0 ms). As in the preceding  
845 spatiotemporal ERP clustering, 0 ms indicated the onset of a target tone when target-evoked N100 was  
846 studied, and the onset of a mask when mask-evoked ERP components were studied. Next, to correct for  
847 between-trial variance introduced by inter-individual EEG differences in the drowsy state of  
848 consciousness, cross-trial weighting of variance was performed. Namely, each data point along a time axis  
849 of a single trial was multiplied by the absolute value of the mean divided by the standard deviation of the  
850 same time point across all trials and all conditions:

851

$$S_{new} = S_{old} \cdot abs\left(\frac{M}{SD}\right)$$

852

853 where  $S_{new}$  is a new weighted single time sample of an individual trial,  $S_{old}$  is an original value of the  
854 same time sample of an individual trial,  $M$  is the mean of all trials across all conditions at the same time  
855 sample, and  $SD$  is the standard deviation of all trials across all conditions at the same time sample. Cross-  
856 trial weighting reduces amplitude of time points that show relatively high inter-trial variance (induced  
857 activity) and amplifies signal with relatively high inter-trial consistency (evoked activity). Importantly,  
858 ERP cross-trial weighting is sensitive to the number of trials included, and thus all conditions in each ERP  
859 analysis were matched by a trial count. Both standardization and cross-trial weighting were carried out  
860 separately for each electrode, i.e. there was no spatial correction implemented in the analysis. For the EEG  
861 slope analysis, cross-trial weighting was carried out by calculating joint  $M$  and  $SD$  over awake and drowsy  
862 trials separately for each gap condition, which had physically different stimuli. For the ERP analysis of  
863 States x Access interaction and ERP source modelling, cross-trial weighting was carried out by  
864 calculating joint  $M$  and  $SD$  over trials in all four conditions included in the analysis, i.e. awake misses,  
865 awake hits, drowsy misses, and drowsy hits.

866

867 **EEG slope analysis.** To study the sensory-central gating and its modulation by the state of consciousness,  
868 EEG epochs locked to the onset of mask were divided between Hori-defined awake (stages 1-2) and  
869 drowsy (stages 4-5) conditions. Next, trials were averaged separately for the 11 gap conditions, and this  
870 was repeated for the awake and the drowsy trials. Mean amplitude of mask-evoked ERP clusters in N100,  
871 P200, and P300 time windows was then averaged separately for each gap condition and both states of  
872 consciousness (see below). This reduced data to six two-dimensional matrices of 92 electrodes x 11 gap  
873 conditions, i.e. one matrix for each state (awake, drowsy) and time window (N100, P200, P300). Next, for  
874 each electrode, a linear function was fitted to 11 amplitude values (one per gap condition), and a slope and  
875 a coefficient of determination ( $R^2$ ) were calculated, using the same functions as for behavioural analysis.  
876 The same procedure was repeated for all six matrices of awake and drowsy datasets at N100, P200 and



877 P300 time windows. Finally, the obtained slope and  $R^2$  raw values were plotted as topographical maps  
878 (see Fig 4A-B and Suppl. Fig 2), and their absolute values were used for statistical analyses.

879 To visualize changing slope across 11 gap conditions, the identified ERP markers of conscious  
880 access were analysed using a measure of global field power (GFP)(Lehmann & Skrandies, 1980) within a  
881 time window of interest. GFP was calculated as a standard deviation of raw voltage values at a single time  
882 point of individually averaged waveforms across all 92 electrodes. This way, GFP reduces spatial  
883 dimension of EEG data to a single value as a parametric summary of a momentary strength of  
884 topographical EEG map. Given that GFP was calculated from weighted EEG data, we refer to the  
885 obtained measure as weighted GFP (wGFP).

886 **ERP analysis of States x Access interaction.** For the analysis of Access x States interactions of the  
887 identified N100, P200 and P300 spatio-temporal clusters (see above), cluster peaks were reassessed by  
888 plotting a waveform of averaged cluster electrodes in gap conditions ‘-12.5%’, ‘0%’ and ‘+12.5%’, and  
889 detecting a peak within a significant cluster time window. While doing this, four conditions of interest –  
890 awake misses, awake hits, drowsy misses, and drowsy hits – were matched by the trial count and then  
891 averaged. Waveform peaks were searched within significant time windows of originally identified  
892 clusters, and the following time windows were used to calculate mean amplitude as close around the peak  
893 as possible without going beyond a cluster significant time windows: 50 ms for N100, 80 ms for P200 and  
894 120 ms for P300. This way, the following time windows were identified and used to calculate mean  
895 amplitude: 118-166 ms for the positive target-evoked N100 cluster (mean amplitude constrained by  
896 cluster significant window of 48 ms), 76-126 ms for the negative mask-evoked N100 cluster, 166-246 ms  
897 for the positive mask-evoked P200 cluster, and 362-482 ms for the positive mask-evoked P300 cluster.  
898 The same cluster time windows were also used for the ERP slope analysis (see above) as well as the ERP  
899 source modeling (see below). Weighted amplitude of a respective ERP component (N100, P200, or P300)  
900 was averaged across cluster electrodes and identified time samples for the statistical analyses.

901  
902 **EEG source modelling.** Weighted minimum norm estimation (wMNE) of single trial sources was carried  
903 out to study whether temporal and fronto-parietal sources contribute to the States x Access interaction.  
904 Source modelling was performed with Brainstorm(Tadel, Baillet, Mosher, Pantazis, & Leahy, 2011),  
905 which is documented and freely available for download online under the GNU general public license  
906 (<http://neuroimage.usc.edu/brainstorm>). A head model was computed using OpenMEEG BEM forward  
907 modelling(Gramfort, Papadopoulos, Olivi, & Clerc, 2010; Kybic et al., 2005), with the following BEM  
908 layers and conductivities: scalp: 1082 vertices – 1; skull: 642 vertices – 0.0125; brain: 642 vertices – 1.  
909 The canonical *Colin27* was used as a structural magnetic resonance imaging (MRI) template to create  
910 these surfaces. Noise covariance computed across all channel pairs was incorporated in the wMNE  
911 algorithm. To draw scouts of the hypothesized sources in the expected regions of interest (ROIs), absolute  
912 values of source activations within each scout were averaged across cluster peak time window that was  
913 determined during ERP analyses (see above), trials and all four conditions, i.e. awake misses, awake hits,  
914 drowsy misses, and drowsy hits (793 trials per condition). N100 and P200 time windows guided  
915 identification of joint temporal lobe source, and P300 time window guided identification of frontal and  
916 parietal sources. The size of the scouts was fixed at 85 cm<sup>2</sup>, centred on the cortical peak of the average  
917 activation. Source activation of each trial and condition within selected scouts was subjected to statistical  
918 analysis.

919  
920 **Statistics.** Statistical analyses were carried out using IBM SPSS Statistics and Matlab R2014a. When  
921 possible, parametric tests were used. When Levene’s test indicated different amounts of variability  
922 between scores of two conditions, equal variances were not assumed when running an independent-  
923 samples t test. Cohen’s d was calculated to assess effect size of pairwise comparisons, using pooled  
924 variance. In cases when data were ordinal, non-parametric tests were used. Regarding specific contrast  
925 conditions:

926 (1) For within-participant comparisons of different measures of drowsiness (Hori,  $\theta/\alpha$ , RT), the  
927 Spearman rank order correlation test was used, as Hori stages are ordinal. The obtained correlation  
928 coefficients were subjected to group level analysis with a one-sample t test. (2) Unequal spread of the rate  
929 of hits across 11 gap conditions was tested using one-way repeated measures ANOVA. (3) To compare  
930 threshold and slope estimates between awake and drowsy trials, a separate paired sample t test was carried  
931 out for each split of data, i.e.  $\theta/\alpha$ -33%,  $\theta/\alpha$ -50%, RT-33%, and RT-50%. (4) To compare  $R^2$  of sigmoid  
932 versus linear fits of the hits' rate across 11 gap conditions between awake and drowsy states of  
933 consciousness, repeated measures ANOVA was carried out separately for the  $\theta/\alpha$ -33% and RT-33% based  
934 splits with Models (linear, sigmoid) and States (awake, drowsy) as independent factors. Pairwise  
935 comparisons were carried out using paired samples t tests. (5) To compare a difference score of the rate of  
936 hits between the easiest and the most difficult gap conditions across Hori Stages 1-6, a one way between  
937 samples ANOVA with a linear contrast was carried out with Hori stages as an independent factor and the  
938 difference score of hits between the easiest and most difficult gap conditions as a dependent factor. In this  
939 trend analysis, a weighted linear term was used to compensate for unequal size of observations across  
940 Hori stages. (6) Association between slope and threshold estimates in awake and drowsy trials was  
941 evaluated using Pearson correlation, which was carried out separately for the  $\theta/\alpha$ -33%,  $\theta/\alpha$ -50%, RT-33%,  
942 and RT-50% splits of the data. (7) To compare the slope of a linear fit across the mean ERP amplitude of  
943 11 gap conditions between awake and drowsy trials in 92 electrodes, repeated measures ANOVA was  
944 carried out with ERP component (N100, P200) and States (awake, drowsy) as fixed factors. Identical test  
945 was carried out to analyse  $R^2$  of these fits. Paired sample t tests were used for follow up analyses of  
946 significant main effects and interactions. (8) To evaluate state-induced modulation of ERP-clusters of  
947 conscious access at a single trial-level, two-way between-trials univariate ANOVA was carried out with  
948 States (awake, drowsy) and Access (miss, hit) as fixed factors, separately for N100, P200, and P300  
949 components. Independent samples t tests were used for follow up analyses of significant main effects and  
950 interactions. (9) To evaluate state-induced modulation of the sources of mask-evoked ERP-clusters at a  
951 single trial-level, two-way between-trials univariate ANOVA was carried out with States (awake, drowsy)  
952 and Access (miss, hit) as fixed factors and the amplitude of the weighted current density averaged across 6  
953 scouts (left frontal, right frontal, left parietal, right parietal, left temporal, right temporal) as the dependent  
954 variable, separately for N100, P200, and P300 components. In a case of a significant main effect of  
955 Access, planned independent samples t tests were carried out to contrast hits and misses in awake and  
956 drowsy states in frontal, parietal and temporal sources, aiming to identify sources with the higher  
957 amplitude in misses than hits. (10) To compare ordinal Hori scores of sleep progression between the  
958 excluded (N=25) and the remaining (N=31) participants, the mode of Hori scores was first calculated for  
959 each participant across the whole EEG session, and these scores were then compared between the groups  
960 using non-parametric Mann-Whitney U test. (11) Pearson  $\chi^2$  test was used to test if excluded participants  
961 were more likely to be male or female compared to the remaining participants. (12) Pearson correlation  
962 was used to assess the strength of association between detection threshold estimates in Block 1 and Block  
963 2 of the behavioural staircase procedure.

## 964 REFERENCES

- 965  
966  
967 Adler, G., & Adler, J. (1989). Influence of stimulus intensity on AEP components in the 80- to 200-  
968 millisecond latency range. *Audiology*, 28(6), 316–324. <http://doi.org/10.3109/00206098909081638>  
969 Androulidakis, A. G., & Jones, S. J. (2006). Detection of signals in modulated and unmodulated noise  
970 observed using auditory evoked potentials. *Clinical Neurophysiology*, 117(8), 1783–1793.  
971 <http://doi.org/10.1016/j.clinph.2006.04.011>  
972 Baars, B. J., Franklin, S., & Ramsøy, T. Z. (2013). Global workspace dynamics: Cortical “binding and  
973 propagation” enables conscious contents. *Frontiers in Psychology*, 4(MAY).  
974 <http://doi.org/10.3389/fpsyg.2013.00200>  
975 Bareham, C. A., Bekinschtein, T. A., Scott, S. K., & Manly, T. (2015). Does left-handedness confer  
976 resistance to spatial bias? *Scientific Reports*, 5, 9162. <http://doi.org/10.1038/srep09162>

- 977 Bareham, C. a, Manly, T., Pustovaya, O. V, Scott, S. K., & Bekinschtein, T. a. (2014). Losing the left side  
978 of the world: rightward shift in human spatial attention with sleep onset. *Scientific Reports*, 4, 5092.  
979 <http://doi.org/10.1038/srep05092>
- 980 Barttfeld, P., Uhrig, L., Sitt, J. D., Sigman, M., Jarraya, B., & Dehaene, S. (2015). Signature of  
981 consciousness in the dynamics of resting-state brain activity. *PNAS*, 112(3), 887–892.  
982 <http://doi.org/10.1073/pnas.1418031112>
- 983 Baulk, S. D., Reyner, L. a, & Horne, J. a. (2001). Driver sleepiness--evaluation of reaction time  
984 measurement as a secondary task. *Sleep*, 24(6), 695–8. Retrieved from  
985 <http://www.ncbi.nlm.nih.gov/pubmed/11560183>
- 986 Blatter, K., Graw, P., Münch, M., Knoblauch, V., Wirz-Justice, A., & Cajochen, C. (2006). Gender and  
987 age differences in psychomotor vigilance performance under differential sleep pressure conditions.  
988 *Behavioural Brain Research*, 168(2), 312–317. <http://doi.org/10.1016/j.bbr.2005.11.018>
- 989 Boehler, C. N., Schoenfeld, M. a, Heinze, H.-J., & Hopf, J.-M. (2008). Rapid recurrent processing gates  
990 awareness in primary visual cortex. *Proceedings of the National Academy of Sciences of the United*  
991 *States of America*, 105(25), 8742–8747. <http://doi.org/10.1073/pnas.0801999105>
- 992 Brainard, D. H. (1997). The Psychophysics Toolbox. *Spatial Vision*, 10(4), 433–436.  
993 <http://doi.org/10.1163/156856897X00357>
- 994 Buck, L. (1966). Reaction time as a measure of perceptual vigilance. *Psychological Bulletin*, 65(5), 291–  
995 304.
- 996 Bullmore, E. T., Suckling, J., Overmeyer, S., Rabe-Hesketh, S., Taylor, E., & Brammer, M. J. (1999).  
997 Global, voxel, and cluster tests, by theory and permutation, for a difference between two groups of  
998 structural MR images of the brain. *IEEE Transactions on Medical Imaging*, 18(1), 32–42.  
999 <http://doi.org/10.1109/42.750253>
- 1000 Capotosto, P., Babiloni, C., Romani, G. L., & Corbetta, M. (2009). Frontoparietal cortex controls spatial  
1001 attention through modulation of anticipatory alpha rhythms. *The Journal of Neuroscience*, 29(18),  
1002 5863–5872. <http://doi.org/10.1523/JNEUROSCI.0539-09.2009>
- 1003 Chalmers, D. (2000). What is a Neural Correlate of Consciousness? *Neural Correlates of Consciousness:*  
1004 *Empirical and Conceptual Issues*, (June 1998), 1–33.  
1005 <http://doi.org/10.1093/acprof:oso/9780195311105.001.0001>
- 1006 Chennu, S., & Bekinschtein, T. A. (2012). Arousal modulates auditory attention and awareness: Insights  
1007 from sleep, sedation, and disorders of consciousness. *Frontiers in Psychology*.  
1008 <http://doi.org/10.3389/fpsyg.2012.00065>
- 1009 Chennu, S., Finoia, P., Kamau, E., Allanson, J., Williams, G. B., Monti, M. M., ... Bekinschtein, T. A.  
1010 (2014). Spectral Signatures of Reorganised Brain Networks in Disorders of Consciousness. *PLoS*  
1011 *Computational Biology*, 10(10).
- 1012 Chennu, S., Noreika, V., Gueorguiev, D., Blenkmann, A., Kochen, S., Ibáñez, A., ... Bekinschtein, T. A.  
1013 (2013). Expectation and attention in hierarchical auditory prediction. *The Journal of Neuroscience :*  
1014 *The Official Journal of the Society for Neuroscience*, 33(27), 11194–205. Retrieved from  
1015 [http://www.pubmedcentral.nih.gov/articlerender.fcgi?artid=3718380&tool=pmcentrez&rendertype=](http://www.pubmedcentral.nih.gov/articlerender.fcgi?artid=3718380&tool=pmcentrez&rendertype=abstract)  
1016 [abstract](http://www.pubmedcentral.nih.gov/articlerender.fcgi?artid=3718380&tool=pmcentrez&rendertype=abstract)
- 1017 Covington, J. W., & Polich, J. (1996). P300, stimulus intensity, and modality. *Electroencephalography*  
1018 *and Clinical Neurophysiology - Evoked Potentials*, 100(6), 579–584. [http://doi.org/10.1016/S0168-](http://doi.org/10.1016/S0168-5597(96)96013-X)  
1019 [5597\(96\)96013-X](http://doi.org/10.1016/S0168-5597(96)96013-X)
- 1020 Dehaene, S., & Changeux, J. P. (2011). Experimental and Theoretical Approaches to Conscious  
1021 Processing. *Neuron*. <http://doi.org/10.1016/j.neuron.2011.03.018>
- 1022 Dehaene, S., Changeux, J. P., Naccache, L., Sackur, J., & Sergent, C. (2006). Conscious, preconscious,  
1023 and subliminal processing: a testable taxonomy. *Trends in Cognitive Sciences*, 10(5), 204–211.  
1024 <http://doi.org/10.1016/j.tics.2006.03.007>
- 1025 Dehaene, S., Charles, L., King, J. R., & Marti, S. (2014). Toward a computational theory of conscious  
1026 processing. *Current Opinion in Neurobiology*. <http://doi.org/10.1016/j.conb.2013.12.005>
- 1027 Del Cul, A., Baillet, S., & Dehaene, S. (2007). Brain dynamics underlying the nonlinear threshold for

- 1028 access to consciousness. *PLoS Biology*, 5(10), 2408–2423.  
1029 <http://doi.org/10.1371/journal.pbio.0050260>
- 1030 Del Cul, A., Dehaene, S., Reyes, P., Bravo, E., & Slachevsky, A. (2009). Causal role of prefrontal cortex  
1031 in the threshold for access to consciousness. *Brain*, 132(9), 2531–2540.  
1032 <http://doi.org/10.1093/brain/awp111>
- 1033 Delorme, A., & Makeig, S. (2004). EEGLAB: An open source toolbox for analysis of single-trial EEG  
1034 dynamics including independent component analysis. *Journal of Neuroscience Methods*, 134(1), 9–  
1035 21. <http://doi.org/10.1016/j.jneumeth.2003.10.009>
- 1036 Demertzi, A., Antonopoulos, G., Heine, L., Voss, H. U., Crone, J. S., De Los Angeles, C., ... Laureys, S.  
1037 (2015). Intrinsic functional connectivity differentiates minimally conscious from unresponsive  
1038 patients. *Brain*, 138(9), 2619–2631. <http://doi.org/10.1093/brain/awv169>
- 1039 Doerfling, P., Ogilvie, R.D., Murphy, T., Lamarche, C. (1996). Applying the Hori sleep scoring system to  
1040 the examination of the sleep onset process in insomniac and normal sleepers. *Sleep Research*, 25,  
1041 123.
- 1042 Elliott, J. C., Baird, B., & Giesbrecht, B. (2016). Consciousness isn't all-or-none: Evidence for partial  
1043 awareness during the attentional blink. *Consciousness and Cognition*, 40, 79–85.  
1044 <http://doi.org/10.1016/j.concog.2015.12.003>
- 1045 Fernández-Espejo, D., & Owen, A. M. (2013). Detecting awareness after severe brain injury. *Nature*  
1046 *Reviews Neuroscience*, 14(11), 801–9. <http://doi.org/10.1038/nrn3608>
- 1047 Fisch, L., Privman, E., Ramot, M., Harel, M., Nir, Y., Kipervasser, S., ... Malach, R. (2009). Neural  
1048 “Ignition”: Enhanced Activation Linked to Perceptual Awareness in Human Ventral Stream Visual  
1049 Cortex. *Neuron*, 64(4), 562–574. <http://doi.org/10.1016/j.neuron.2009.11.001>
- 1050 Goupil, L., & Bekinschtein, T. A. (2012). Cognitive processing during the transition to sleep. *Archives*  
1051 *Italiennes de Biologie*, 150(2–3), 140–154. <http://doi.org/10.4449/aib.v150i2.1247>
- 1052 Gramfort, A., Papadopoulo, T., Olivi, E., & Clerc, M. (2010). OpenMEEG: opensource software for  
1053 quasistatic bioelectromagnetics. *Biomedical Engineering Online*, 9, 45. <http://doi.org/10.1186/1475-925X-9-45>
- 1054
- 1055 Gutschalk, A., Micheyl, C., & Oxenham, A. J. (2008). Neural correlates of auditory perceptual awareness  
1056 under informational masking. *PLoS Biology*, 6(6), 1156–1165.  
1057 <http://doi.org/10.1371/journal.pbio.0060138>
- 1058 Hori, T., Hayashi, M., & Morikawa, T. (1994). Topographical EEG changes and the hypnagogic  
1059 experience. *Sleep Onset: Normal and Abnormal Processes*. <http://doi.org/10.1037/10166-014>
- 1060 Johns, M. W. (1991). A new method for measuring daytime sleepiness: the Epworth sleepiness scale.  
1061 *Sleep*. <http://doi.org/10.1016/j.sleep.2007.08.004>
- 1062 Kerr, M., Mingay, R., & Elithorn, A. (n.d.). Cerebral dominance in reaction time responses. *British*  
1063 *Journal of Psychology*, 54, 325–336. <http://doi.org/10.1111/j.2044-8295.1963.tb00887.x>
- 1064 King, J. R., Sitt, J. D., Faugeras, F., Rohaut, B., El Karoui, I., Cohen, L., ... Dehaene, S. (2013).  
1065 Information sharing in the brain indexes consciousness in noncommunicative patients. *Current*  
1066 *Biology*, 23(19), 1914–1919. <http://doi.org/10.1016/j.cub.2013.07.075>
- 1067 Koch, C., Massimini, M., Boly, M., & Tononi, G. (2016). Neural correlates of consciousness: progress  
1068 and problems. *Nature Reviews Neuroscience*, 17(5), 307–321. <http://doi.org/10.1038/nrn.2016.22>
- 1069 Koivisto, M., & Revonsuo, A. (2010). Event-related brain potential correlates of visual awareness.  
1070 *Neuroscience and Biobehavioral Reviews*. <http://doi.org/10.1016/j.neubiorev.2009.12.002>
- 1071 Kouider, S., Andriillon, T., Barbosa, L. S., Goupil, L., & Bekinschtein, T. A. (2014). Inducing task-  
1072 relevant responses to speech in the sleeping brain. *Current Biology*, 24(18), 2208–2214.  
1073 <http://doi.org/10.1016/j.cub.2014.08.016>
- 1074 Kybic, J., Clerc, M., Abboud, T., Faugeras, O., Keriven, R., & Papadopoulo, T. (2005). A common  
1075 formalism for the integral formulations of the forward EEG problem. *IEEE Transactions on*  
1076 *Medical Imaging*, 24(1), 12–28. <http://doi.org/10.1109/TMI.2004.837363>
- 1077 Langsjo, J. W., Revonsuo, A., & Scheinin, H. (2014). Harnessing Anesthesia and Brain Imaging for the  
1078 Study of Human Consciousness. *CURRENT PHARMACEUTICAL DESIGN*, 20(26), 4211–4224.

- 1079 Lehmann, D., & Skrandies, W. (1980). Reference-free identification of components of checkerboard-  
1080 evoked multichannel potential fields. *Electroencephalography and Clinical Neurophysiology*, 48(6),  
1081 609–621. [http://doi.org/10.1016/0013-4694\(80\)90419-8](http://doi.org/10.1016/0013-4694(80)90419-8)
- 1082 Lijffijt, M., Cox, B., Acas, M. D., Lane, S. D., Moeller, F. G., & Swann, A. C. (2012). Differential  
1083 relationships of impulsivity or antisocial symptoms on P50, N100, or P200 auditory sensory gating  
1084 in controls and antisocial personality disorder. *Journal of Psychiatric Research*, 46(6), 743–750.  
1085 <http://doi.org/10.1016/j.jpsychires.2012.03.001>
- 1086 Lim, J., & Dinges, D. F. (2010). A meta-analysis of the impact of short-term sleep deprivation on  
1087 cognitive variables. *Psychological Bulletin*, 136(3), 375–89. <http://doi.org/10.1037/a0018883>
- 1088 Makeig, S., Jung, T. P., Bell, A. J., Ghahremani, D., & Sejnowski, T. J. (1997). Blind separation of  
1089 auditory event-related brain responses into independent components. *Proceedings of the National  
1090 Academy of Sciences of the United States of America*, 94(20), 10979–84.  
1091 <http://doi.org/10.1073/pnas.94.20.10979>
- 1092 Marcel, A. J. (1983). Conscious and unconscious perception: Experiments on visual masking and word  
1093 recognition. *Cognitive Psychology*, 15(2), 197–237. [http://doi.org/10.1016/0010-0285\(83\)90009-9](http://doi.org/10.1016/0010-0285(83)90009-9)
- 1094 Maris, E., & Oostenveld, R. (2007). Nonparametric statistical testing of EEG- and MEG-data. *Journal of  
1095 Neuroscience Methods*, 164(1), 177–190. <http://doi.org/10.1016/j.jneumeth.2007.03.024>
- 1096 Marreiros, A. C., Daunizeau, J., Kiebel, S. J., & Friston, K. J. (2008). Population dynamics: Variance and  
1097 the sigmoid activation function. *NeuroImage*, 42(1), 147–157.  
1098 <http://doi.org/10.1016/j.neuroimage.2008.04.239>
- 1099 Moutard, C., Dehaene, S., & Malach, R. (2015). Spontaneous Fluctuations and Non-linear Ignitions: Two  
1100 Dynamic Faces of Cortical Recurrent Loops. *Neuron*. <http://doi.org/10.1016/j.neuron.2015.09.018>
- 1101 Nittono, H., Momose, D., & Hori, T. (n.d.). Gradual changes of mismatch negativity during the sleep  
1102 onset period. *Sleep Research Online*, 2 (Suppl.), 287.
- 1103 Noreika, V. (2015). It's Not Just About the Contents: Searching for a Neural Correlate of a State of  
1104 Consciousness. In T. Metzinger & J. M. Windt (Eds.), *Open MIND* (p. 36(C)). Frankfurt am Main:  
1105 MIND Group. <http://doi.org/10.15502/9783958570504>
- 1106 Ogilvie, R. D. (2001). The process of falling asleep. *Sleep Medicine Reviews*.  
1107 <http://doi.org/10.1053/smr.2001.0145>
- 1108 Ogilvie, R. D., & Wilkinson, R. T. (1984). The Detection of Sleep Onset: Behavioral and Physiological  
1109 Convergence. *Psychophysiology*, 21(5), 510–520. <http://doi.org/10.1111/j.1469-8986.1984.tb00234.x>
- 1110
- 1111 Olbrich, S., Mulert, C., Karch, S., Trenner, M., Leicht, G., Pogarell, O., & Hegerl, U. (2009). EEG-  
1112 vigilance and BOLD effect during simultaneous EEG/fMRI measurement. *NeuroImage*, 45(2), 319–  
1113 332. <http://doi.org/10.1016/j.neuroimage.2008.11.014>
- 1114 Oldfield, R. C. (1971). The assessment and analysis of handedness: The Edinburgh inventory.  
1115 *Neuropsychologia*, 9(1), 97–113. [http://doi.org/10.1016/0028-3932\(71\)90067-4](http://doi.org/10.1016/0028-3932(71)90067-4)
- 1116 Oostenveld, R., Fries, P., Maris, E., & Schoffelen, J. M. (2011). FieldTrip: Open source software for  
1117 advanced analysis of MEG, EEG, and invasive electrophysiological data. *Computational  
1118 Intelligence and Neuroscience*, 2011. <http://doi.org/10.1155/2011/156869>
- 1119 Overgaard, M., & Mogensen, J. (2011). A framework for the study of multiple realizations: The  
1120 importance of levels of analysis. *Frontiers in Psychology*, 2(APR).  
1121 <http://doi.org/10.3389/fpsyg.2011.00079>
- 1122 Parasuraman, R., & Beatty, J. (1980). Brain events underlying detection and recognition of weak sensory  
1123 signals. *Science (New York, N.Y.)*, 210(4465), 80–83. <http://doi.org/10.1126/science.7414324>
- 1124 Philip, P., Taillard, J., Quera-Salva, M. A., Bioulac, B., & Åkerstedt, T. (1999). Simple reaction time,  
1125 duration of driving and sleep deprivation in young versus old automobile drivers. *Journal of Sleep  
1126 Research*, 8(1), 9–14. <http://doi.org/10.1046/j.1365-2869.1999.00127.x>
- 1127 Picchioni, D., Fukunaga, M., Carr, W. S., Braun, A. R., Balkin, T. J., Duyn, J. H., & Horovitz, S. G.  
1128 (2008). fMRI differences between early and late stage-1 sleep. *Neuroscience Letters*, 441(1), 81–85.  
1129 <http://doi.org/10.1016/j.neulet.2008.06.010>

- 1130 Railo, H., Koivisto, M., & Revonsuo, A. (2011). Tracking the processes behind conscious perception: A  
1131 review of event-related potential correlates of visual consciousness. *Consciousness and Cognition*.  
1132 <http://doi.org/10.1016/j.concog.2011.03.019>
- 1133 Ratcliff, R., & Van Dongen, H. P. a. (2011). Diffusion model for one-choice reaction-time tasks and the  
1134 cognitive effects of sleep deprivation. *Proceedings of the National Academy of Sciences of the*  
1135 *United States of America*. <http://doi.org/10.1073/pnas.1100483108>
- 1136 Salti, M., Monto, S., Charles, L., King, J. R., Parkkonen, L., & Dehaene, S. (2015). Distinct cortical codes  
1137 and temporal dynamics for conscious and unconscious percepts. *eLife*, 4(MAY), 1–52.  
1138 <http://doi.org/10.7554/eLife.05652>
- 1139 Sandberg, K., Bibby, B. M., Timmermans, B., Cleeremans, A., & Overgaard, M. (2011). Measuring  
1140 consciousness: Task accuracy and awareness as sigmoid functions of stimulus duration.  
1141 *Consciousness and Cognition*, 20(4), 1659–1675. <http://doi.org/10.1016/j.concog.2011.09.002>
- 1142 Schmidt, E. A., Schrauf, M., Simon, M., Fritzsche, M., Buchner, A., & Kincses, W. E. (2009). Drivers’  
1143 misjudgement of vigilance state during prolonged monotonous daytime driving. *Accident Analysis*  
1144 *and Prevention*, 41(5), 1087–1093. <http://doi.org/10.1016/j.aap.2009.06.007>
- 1145 Sergent, C., & Dehaene, S. (2004). Is consciousness a gradual phenomenon? Evidence for an all-or-none  
1146 bifurcation during the attentional blink. *Psychological Science*, 15(11), 720–728.  
1147 <http://doi.org/10.1111/j.0956-7976.2004.00748.x>
- 1148 Siclari, F., Baird, B., Perogamvros, L., Bernardi, G., LaRocque, J. J., Riedner, B., ... Tononi, G. (2016).  
1149 The neural correlates of dreaming. *BioRxiv*, 1–52. <http://doi.org/10.1101/012443>
- 1150 Singer, W. (2015). The ongoing search for the neuronal correlate of consciousness. In T. Metzinger & J.  
1151 M. Windt (Eds.), *Open MIND* (p. 36(T)). Frankfurt am Main: MIND Group.  
1152 <http://doi.org/10.15502/9783958570344>
- 1153 Sitt, J. D., King, J. R., El Karoui, I., Rohaut, B., Faugeras, F., Gramfort, A., ... Naccache, L. (2014).  
1154 Large scale screening of neural signatures of consciousness in patients in a vegetative or minimally  
1155 conscious state. *Brain*, 137(8), 2258–2270. <http://doi.org/10.1093/brain/awu141>
- 1156 Soranzo, A., & Grassi, M. (2014). Psychoacoustics: A comprehensive MATLAB toolbox for auditory  
1157 testing. *Frontiers in Psychology*, 5(JUL). <http://doi.org/10.3389/fpsyg.2014.00712>
- 1158 Tadel, F., Baillet, S., Mosher, J. C., Pantazis, D., & Leahy, R. M. (2011). Brainstorm: A user-friendly  
1159 application for MEG/EEG analysis. *Computational Intelligence and Neuroscience*, 2011.  
1160 <http://doi.org/10.1155/2011/879716>
- 1161 Tagliazucchi, E., Behrens, M., & Laufs, H. (2013). Sleep neuroimaging and models of consciousness.  
1162 *Frontiers in Psychology*. <http://doi.org/10.3389/fpsyg.2013.00256>
- 1163 Tagliazucchi, E., & Laufs, H. (2014). Decoding Wakefulness Levels from Typical fMRI Resting-State  
1164 Data Reveals Reliable Drifts between Wakefulness and Sleep. *Neuron*, 82(3), 695–708.  
1165 <http://doi.org/10.1016/j.neuron.2014.03.020>
- 1166 Tanaka, H., Hayashi, M., & Hori, T. (1996). Statistical features of hypnagogic EEG measured by a new  
1167 scoring system. *Sleep*, 19(9), 731–738.
- 1168 Tanaka, H., Hayashi, M., & Hori, T. (1997). Topographical characteristics and principal component  
1169 structure of the hypnagogic EEG. *Sleep*, 20(7), 523–534.
- 1170 Tsai, L. L., & Li, S. P. (2004). Sleep patterns in college students: Gender and grade differences. *Journal*  
1171 *of Psychosomatic Research*, 56(2), 231–237. [http://doi.org/10.1016/S0022-3999\(03\)00507-5](http://doi.org/10.1016/S0022-3999(03)00507-5)
- 1172 van Dijk, H., Schoffelen, J.-M., Oostenveld, R., & Jensen, O. (2008). Prestimulus oscillatory activity in  
1173 the alpha band predicts visual discrimination ability. *The Journal of Neuroscience*, 28(8), 1816–23.  
1174 <http://doi.org/10.1523/JNEUROSCI.1853-07.2008>
- 1175 van Loon, A. M., Scholte, H. S., van Gaal, S., van der Hoort, B. J., & Lamme, V. A. (2012). GABAA  
1176 agonist reduces visual awareness: a masking-EEG experiment. *Journal of Cognitive Neuroscience*,  
1177 24(4), 965–974. [http://doi.org/10.1162/jocn\\_a\\_00197](http://doi.org/10.1162/jocn_a_00197)
- 1178 von Békésy, G. (1947). A New Audiometer . *Acta Otolaryngology*, 35(906394904), 411–422.  
1179 <http://doi.org/10.3109/00016484709123756>
- 1180 Vyazovskiy, V. V., Olcese, U., Hanlon, E. C., Nir, Y., Cirelli, C., & Tononi, G. (2011). Local sleep in

181  
182  
183  
184

awake rats. *Nature*, 472(7344), 443–7. <http://doi.org/10.1038/nature10009>

## SUPPLEMENTARY TABLE

**Supplementary Table 1. Slope and threshold estimates in awake and drowsy states: statistics**

| State definition                  | Difference between awake and drowsy states in slope |                | Difference between awake and drowsy states in threshold |          | Correlation between slope and threshold in awake state |          | Correlation between slope and threshold in drowsy state |          | Correlation between awake and drowsy slope |                | Correlation between awake and drowsy threshold |                |
|-----------------------------------|-----------------------------------------------------|----------------|---------------------------------------------------------|----------|--------------------------------------------------------|----------|---------------------------------------------------------|----------|--------------------------------------------|----------------|------------------------------------------------|----------------|
|                                   | <i>t(d)</i>                                         | <i>p</i>       | <i>t(d)</i>                                             | <i>p</i> | <i>r</i>                                               | <i>p</i> | <i>r</i>                                                | <i>p</i> | <i>r</i>                                   | <i>p</i>       | <i>r</i>                                       | <i>p</i>       |
|                                   |                                                     |                |                                                         |          |                                                        |          |                                                         |          |                                            |                |                                                |                |
| $\theta/\alpha$ -33% <sup>a</sup> | <b>3.2(.78)</b>                                     | <b>.004</b>    | .78(.15)                                                | .44      | -.07                                                   | .73      | -.2                                                     | .33      | .2                                         | .33            | <b>.52</b>                                     | <b>.006</b>    |
| $\theta/\alpha$ -50% <sup>b</sup> | <b>2.99(.61)</b>                                    | <b>.006</b>    | .74(.11)                                                | .47      | -.11                                                   | .58      | -.3                                                     | .12      | .41                                        | .027           | <b>.68</b>                                     | <b>.000047</b> |
| RT-33% <sup>c</sup>               | <b>5.81(1.3)</b>                                    | <b>.00001</b>  | 1.83(.29)                                               | .078     | -.14                                                   | .48      | -.15                                                    | .48      | <b>.68</b>                                 | <b>.0001</b>   | <b>.7</b>                                      | <b>.00008</b>  |
| RT-50% <sup>d</sup>               | <b>5.93(1.1)</b>                                    | <b>.000002</b> | 1.33(.17)                                               | .19      | .01                                                    | .94      | -.21                                                    | .25      | <b>.78</b>                                 | <b>.000001</b> | <b>.77</b>                                     | <b>.000002</b> |

**Note:** <sup>a</sup> N=27; <sup>b</sup> N=31; <sup>c</sup> N=26; <sup>d</sup> N=29 (some participants were excluded because sigmoid could not be fitted to their responses, or because their threshold or slope difference between awake and drowsy states was an outlier, i.e. 2 SD above/below the group mean). Results significant after correction for multiple comparisons are highlighted in bold.

## SUPPLEMENTARY FIGURES

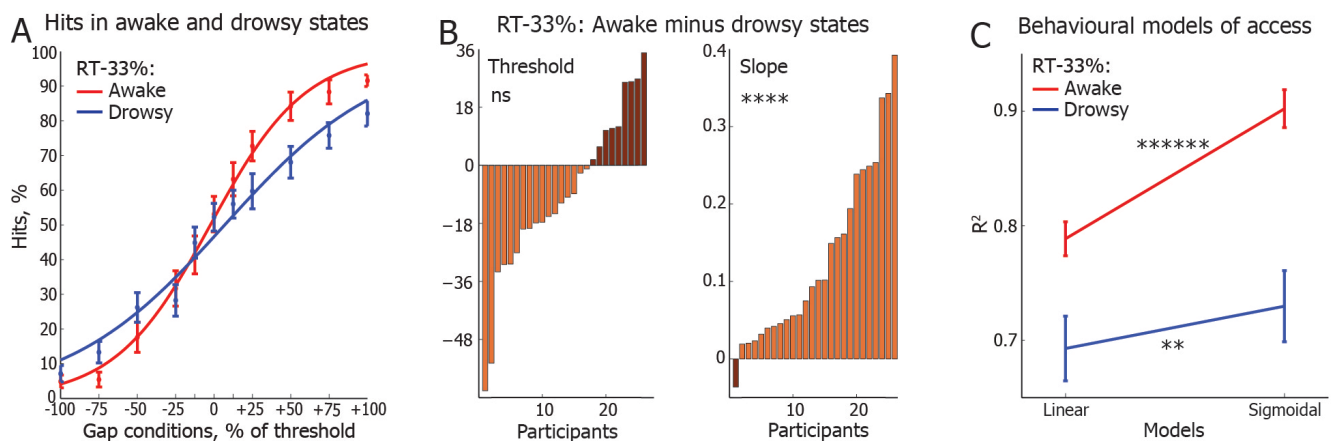

**Supplementary Figure 1: Slope and threshold estimates in RT-defined relaxation and drowsiness.** (A) Sigmoidal functions fitted to the awake (red) and drowsy (blue) hits, following RT-33% definitions of the states of consciousness. The trials were first averaged within each participant and then across all participants. The error bars indicate the standard error of mean (SEM), calculated across all participants. (B) Threshold and slope estimates in the drowsy state subtracted from those in the awake state. Individual participants (N=29), represented as bars, are sorted from the one with the largest increase of threshold (light brown) to the one with the largest decrease (dark brown) of threshold in drowsiness (left), and from the one with the largest increase of slope (light brown) to the one with the largest decrease of slope (dark brown) in drowsiness (right). Data split in this plot is based on the RT-33% definition of the awake and drowsy states. Levels of significance: ns =  $p > 0.05$ ; \*\*\*\*  $p < 0.00005$ . (C) Coefficient of determination ( $R^2$ ) of linear and sigmoidal models of the proportion of hits as a function of gap in the awake and drowsy trials as defined by RT-33%. The error bars indicate the SEM. Levels of significance: \*\*  $p < 0.005$ ; \*\*\*\*\*  $p < 0.0000005$ .

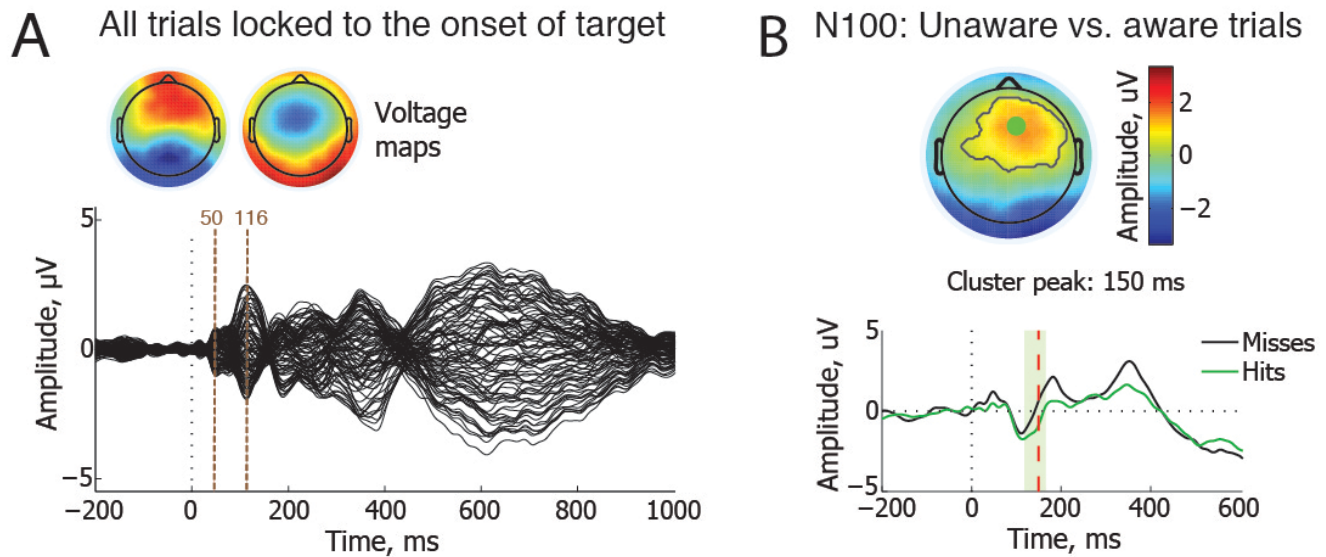

**Supplementary Figure 2: ERP marker of conscious access.** (A) A butterfly plot of ERP waveforms locked to the onset of target, baseline corrected from -100 ms to 0 ms. Topographical voltage maps depict spatial distribution of the butterfly peaks at 50 ms and 116 ms (brown verticals), revealing typical distribution of P50 and N100 auditory potentials. A relatively late 116 ms latency of the N100 peak likely depended on a weak intensity of the target sound (single frequency, short duration, low amplitude), as the N100 latency increases with a decreasing intensity of auditory stimuli (Adler & Adler, 1989; Covington & Polich, 1996). These data were taken from 10 participants with the highest threshold of target detection, i.e. the longest period of silence between the target and the masking tones. While the first two peaks reflect neuronal processing of target, the mask, timing of which varied within and between participants, likely contributed to the peaks above 170 ms. (B) Spatiotemporal clustering of ERPs locked to the target sound. Hits (green waveform) and misses (black waveform) were compared within N100 time window for 10 participants with the highest auditory detection threshold. Green shaded vertical bar behind the waveforms represents time window of a significant difference between hits and misses (cluster  $t=2373.1$ ,  $p=0.001$ ). These waveforms are taken from the fronto-central electrode with the largest difference between hits and misses, marked as a green dot in the topographical voltage map. The black contours within the map reveal which electrodes showed a significant difference, i.e. the more negative amplitude in hits than misses, and formed a spatiotemporal cluster. Red vertical line at 150 ms in the waveform reveals the peak time of the largest difference between hits and misses. The topographical voltage map depicts the very same time point of the most significant difference between conditions.



### Linear fit of P300 response to mask across gap conditions

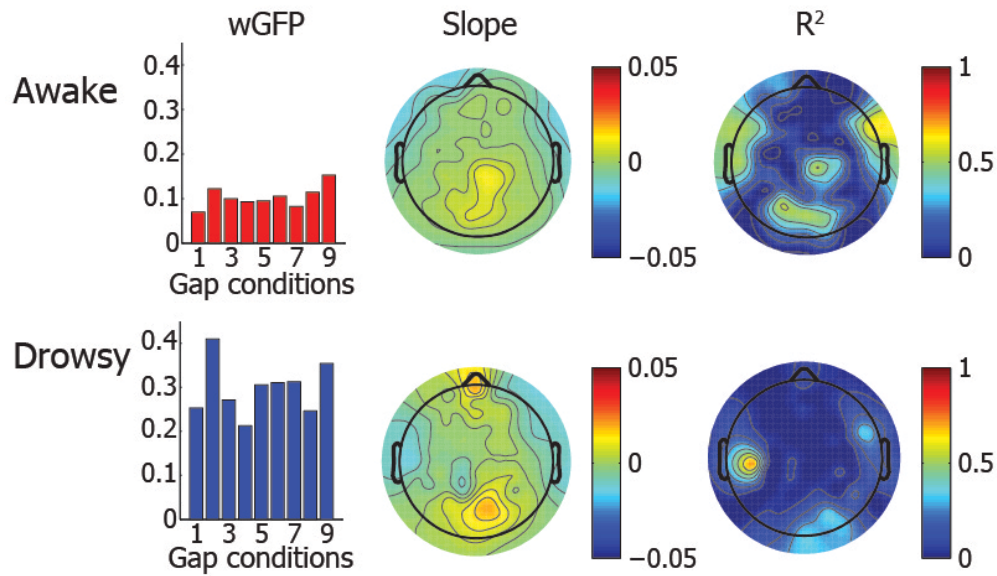

**Supplementary Figure 3: Linear fit of P300 responses to the onset of mask across gap conditions.** Linear fit of the mask-locked P300 mean amplitudes across gap conditions 1-11. The top line represents fit of the awake trials (Hori 1-2), whereas the bottom line depicts fit of the drowsy trials (Hori 4-5). Subplots on the left show the mean weighted GFP in a P300 time window across equally spaced gap conditions 1-4, 6, 8-11. Conditions 5 and 7 are not presented here, as they were additional intermediate intervals. The middle subplots show scalp maps of slope values of a linear function, which was fitted to the mean amplitude of P300 peaks across gap conditions 1-11. The slope was first calculated for each electrode and the obtained values were interpolated in the heat maps. Likewise, subplots on the right show scalp maps of the goodness of linear fit, expressed as  $R^2$ , which was first calculated for each fit across gap conditions within a single electrode, and the obtained values were interpolated in the heat maps.

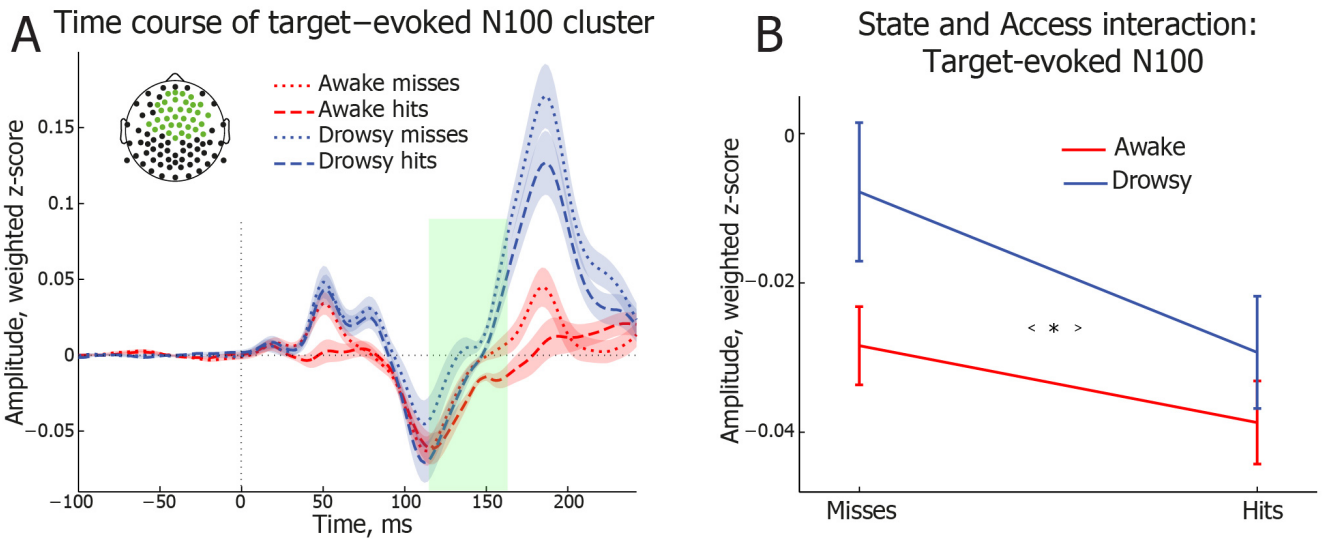

**Supplementary Figure 4: Target locked N100 marks conscious access in awake and drowsy states.** (A) Time course of N100 cluster locked to the onset of target. Waveforms are averaged across the cluster electrodes, which are depicted in green in the electrode montage map. Individual trials are averaged separately for the four conditions: awake misses, awake hits, drowsy misses, and drowsy hits. Green shaded bar indicates time window that was used to calculate the mean amplitude of the cluster. Error bars indicate SEM. (B) Target-evoked N100 cluster revealed significant main effects of State ( $F_{(1,1272)}=4.48$ ,  $p=0.035$ ) and Access ( $F_{(1,1272)}=5.03$ ,  $p=0.025$ ), whereas the States  $\times$  Access interaction was not significant ( $F_{(1,1272)}=0.63$ ,  $p=0.43$ ). Hits were associated with higher target-evoked N100 amplitude than misses ( $t_{(1274)}=2.24$ ,  $p=0.025$ ,  $d=0.13$ ), and awake state was associated with higher cluster amplitude than drowsiness ( $t_{(1083)}=2.11$ ,  $p=0.035$ ,  $d=0.13$ ). \* $p<0.05$ .

### Time course and state-dependency of temporal source amplitude

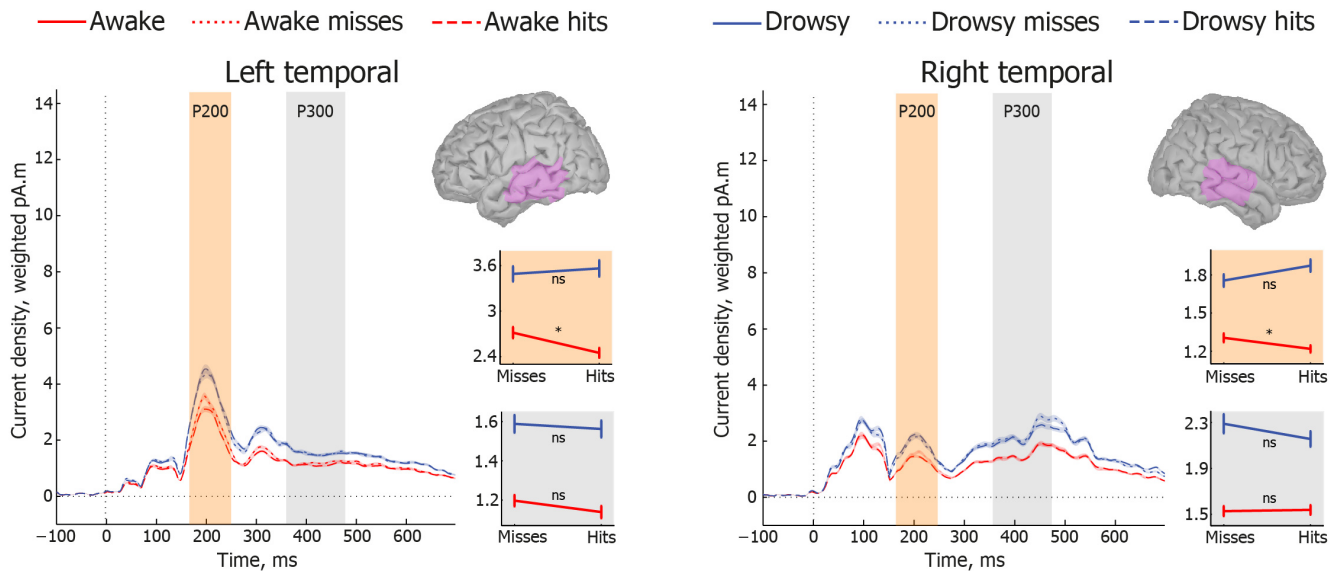

**Supplementary Figure 5: Temporal sources of mask-evoked ERP clusters.** The planned  $t$  test comparisons of temporal source activations between hits and misses in awake and drowsy states in P200 (orange) and P300 (grey) time windows. Waveforms indicate time courses of source activations, whereas statistical plots depict significance level of the planned comparisons within respective time windows: \* $p<0.05$ . Error bars indicate SEM. In the P200 time window, awake misses had higher amplitude than awake hits in the left temporal ( $t_{(1560.6)}=2.73$ ,  $p=0.0063$ ,  $d=0.14$ ) and the right temporal ( $t_{(1520.6)}=2$ ,  $p=0.045$ ,  $d=0.1$ ) sources.
